# Supplementary material for: Efficient hydrogen evolution at Ni/CeO x interfaces in anion-exchange membrane water electrolysers
Source: Royal Society of Chemistry journal article supplement (doi:10.1039/d4ee06113f), 2025-01-01
Supplement: d4ee06113f1.pdf [file d4ee06113f1.pdf]

## Supplementary Information

### **Efficient hydrogen evolution at Ni/CeO<sub>x</sub> interfaces in anion-exchange membrane water electrolyzers**

Ibrahim O. Baibars<sup>1</sup>, Haisen Huang<sup>2</sup>, Yang Xiao<sup>1</sup>, Shuhao Wang<sup>1</sup>, Yan Nie<sup>1</sup>, Chen Jia<sup>1</sup>, Kamran Dastafkan<sup>1</sup>, and Chuan Zhao<sup>\*1</sup>

<sup>1</sup>School of Chemistry, Faculty of Science, University of New South Wales (UNSW)

<sup>2</sup>CAS Key Laboratory of Materials for Energy Conversion, Department of Materials Science and Engineering, University of Science and Technology of China, Hefei, Anhui, 230026, P.R. China.

\*Corresponding author: [chuan.zhao@unsw.edu.au](mailto:chuan.zhao@unsw.edu.au)

## Calculation methods

### Potential conversion

All potentials reported for half cells are measured vs. calibrated Saturated Calomel Electrode (SCE) but reported vs. the reversible hydrogen electrode (RHE), following equation S1.

$$E_{\text{RHE}} = E_{\text{SCE}} + 0.241 + 0.059 \text{ pH} \quad (\text{S1})$$

### Deposition faradaic efficiency

The faradaic efficiencies of the deposition processes are determined by separate calculations of the electric charges consumed in the deposition of Ni ( $Q_{\text{Ni}}$ ) and  $\text{CeO}_x$  ( $Q_{\text{CeO}_x}$ ) relative to the total applied charge, according to equation S2. The remaining charge, other than that used in film deposition, is described as hydrogen evolution charge, where other competing reactions, such as oxygen and nitrate reduction, have minimal contribution due to their low concentrations involved.

$$\text{Faradaic efficiency } \% = \frac{Q_{\text{Ni}} + Q_{\text{CeO}_x}}{Q_{\text{total}}} \times 100 \quad (\text{S2})$$

where  $Q_{\text{Ni}}$  and  $Q_{\text{CeO}_x}$  are calculated from the masses measured by ICP-OES according to equations S3 and S4.

$$Q_{\text{Ni}} = \frac{m_{\text{Ni}} \times n \times F}{\text{Atomic mass}_{\text{Ni}}} = \frac{m_{\text{Ni}} \times 2 \times 96485}{58.69} \quad (\text{S3})$$

$$Q_{\text{CeO}_x} = \frac{m_{\text{Ce}} \times n \times F}{\text{Atomic mass}_{\text{Ce}}} = \frac{m_{\text{Ce}} \times 1 \times 96485}{140.12} \quad (\text{S4})$$

where  $F$  represents Faraday's constant,  $m$  is the mass in grams of each respective element, and  $n$  denotes the number of electrons involved in the deposition process, which is 2 in case of  $\text{Ni}^{2+}$  (solution) to  $\text{Ni}^0$  (catalyst) conversion, see equation S5, and considered 1 in case of  $\text{CeO}_x$  deposition, see equations S6-S8.

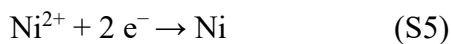

The deposition mechanism of  $\text{CeO}_2$  from  $\text{Ce}^{3+}$  ions is controversial, being an oxidative deposition happening at the cathode. Herein, the  $\text{H}_2\text{O}_2$ -mediated deposition mechanism is adopted, where a chemical deposition occurs via  $\text{H}_2\text{O}_2$  molecules (equation S7), which are electrochemically generated from dissolved  $\text{O}_2$  reduction at the cathode (equation S6), with  $\text{H}_2\text{O}_2$  acting as an oxidising and reducing agent, respectively, in a mediation process<sup>1</sup>. This may explain the very low faradaic efficiency (0.37%) observed for  $\text{CeO}_x$  deposition, bearing in

mind that dissolved O<sub>2</sub> is a limiting reactant. The absence of macroporosity in the CeO<sub>x</sub> film could be explained via this mechanism by considering the slow rate of particle growth (due to the lack of vicinal O<sub>2</sub>) around the formed hydrogen bubbles that evolve rapidly before hollow cone-shaped morphologies can be built.

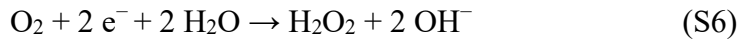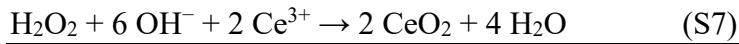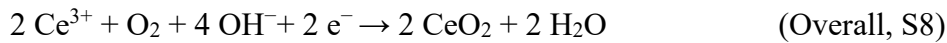

### Tafel slopes and exchange current densities

Linear fittings of the charge-transfer-controlled linear regions of Tafel plots to Tafel equation (S9) are used to determine both Tafel slopes and exchange current densities from slopes and intercepts, respectively <sup>2</sup>.

$$|\eta| = b \log|i| - b \log|i_0| \quad (\text{S9})$$

where  $\eta$  is the measured overpotential in (V),  $i$  is the measured current density in (A cm<sup>-2</sup>),  $b$  is Tafel slope ( $\frac{2.303 \times RT}{\alpha n F}$ ), and  $i_0$  is the exchange current density in (A cm<sup>-2</sup>).

### ECSA and C<sub>dl</sub> calculations

Values of the electrochemical active surface area (*ECSA*) are calculated in (cm<sup>2</sup>) and reported in cm<sup>2</sup><sub>ECSA</sub>/cm<sup>2</sup><sub>geo</sub> as they are measured over 1 cm<sup>2</sup><sub>geo</sub> substrates. These values are calculated from the corresponding double-layer capacitance (*C<sub>dl</sub>*) of the film, according to equation S10.

$$ECSA = \frac{C_{dl}}{C_s} \quad (\text{S10})$$

where  $C_s$  is the specific capacitance, which is reported in the literature to equal 0.04 (mF cm<sup>-2</sup><sub>ECSA</sub>) in 1.0 M OH<sup>-</sup> solutions <sup>3-5</sup>. On the other hand, *C<sub>dl</sub>* values are figured from the measured slopes of the linear variations of capacitive current at a certain potential with the applied potential scan rate, according to equation S11.

$$I = C_{dl} \times \frac{dE}{dt} \quad (\text{S11})$$

where  $C_{dl}$  comes in (mF) when  $I$  (the capacitive current) is in (A) and  $\frac{dE}{dt}$  (the scan rate) is in (mV s<sup>-1</sup>). The gravimetric-specific *ECSA* values are calculated per (mg) of the deposited catalyst according to equation S12.

$$\text{Specific ECSA} = \frac{ECSA}{m} \quad (S12)$$

where  $m$  is the mass of the deposited film in mg.

### **TOF calculations**

Turnover frequency (*TOF*) values, the number of hydrogen molecules generated per second per active site, are calculated following equation S13.

$$TOF = \frac{I_{H_2} \times N_A}{x \times n_{H_2} \times F} \quad (S13)$$

where  $I_{H_2}$  is the HER current in (A),  $N_A$  is Avogadro's constant,  $n_{H_2}$  is the number of electrons consumed in the production of one molecule of H<sub>2</sub>, which is 2,  $F$  is Faraday's constant, and  $x$  is the number of active sites, which is calculated from the corresponding redox CV of each film, according to equation S14.

$$x = \frac{Q_{CV} \times N_A}{n_{CV} \times F} \quad (S14)$$

where  $Q_{CV}$  is the charge associated with each CV in (C), and  $n_{CV}$  is the number of electrons involved in the processes during the CV, which is 2. Therefore, equation S13 can be simplified to equation S15.

$$TOF = \frac{I_{H_2}}{Q_{CV}} = \frac{I_{H_2} \times (dE/dt)_{CV}}{(\int I dE)_{CV}} \quad (S15)$$

Where  $(dE/dt)_{CV}$  is the potential scan rate used for CV in (V s<sup>-1</sup>), and  $(\int I dE)_{CV}$  is the area enclosed by the CV in (A V) calculated by integration.

### **Energy efficiency in AEMWE**

The values of energy efficiency are dependent on the operating current density, the associated cell voltage, and the heating value of hydrogen. These values are calculated, according to

equation S16&S17, based on the higher heating value (HHV, 285.8 kJ mol<sup>-1</sup>) and the lower heating value (LHV, 241.8 kJ mol<sup>-1</sup>) of hydrogen gas <sup>6</sup>, respectively.

$$\begin{aligned}
 \text{HHV Energy efficiency} &= \frac{\text{HHV of H}_2}{\text{Consumed electricity}} \times 100 = \frac{285.8 \text{ (kJ mol}^{-1}\text{)} \times 100}{nFE_{\text{cell}}} \\
 &= \frac{285.8 \text{ (kJ mol}^{-1}_{\text{H}_2}) \times 100}{2 \text{ (mol}_e\text{- mol}^{-1}_{\text{H}_2}) \times 96485 \text{ (C mol}_e^{-1}\text{)} \times E_{\text{cell}}} \\
 &= \frac{1.481 \text{ (V)}}{E_{\text{cell}} \text{ (V)}} \times 100 \quad (\text{S16})
 \end{aligned}$$

$$\begin{aligned}
 \text{LHV Energy efficiency} &= \frac{\text{LHV of H}_2}{\text{Consumed electricity}} \times 100 = \frac{241.8 \text{ (kJ mol}^{-1}\text{)} \times 100}{nFE_{\text{cell}}} \\
 &= \frac{241.8 \text{ (kJ mol}^{-1}_{\text{H}_2}) \times 100}{2 \text{ (mol}_e\text{- mol}^{-1}_{\text{H}_2}) \times 96485 \text{ (C mol}_e^{-1}\text{)} \times E_{\text{cell}}} \\
 &= \frac{1.253 \text{ (V)}}{E_{\text{cell}} \text{ (V)}} \times 100 \quad (\text{S17})
 \end{aligned}$$

where  $n$  is the number of moles of electrons consumed to produce a mole of hydrogen gas,  $F$  denotes Faraday's constant, and  $E_{\text{cell}}$  is the operating cell voltage.

### Electrical efficiency in AEMWE

The amount of electrical energy consumed to produce 1 kg of hydrogen is also dependent on the operating current density (rate of production) and the corresponding cell voltage, equation S18.

$$\begin{aligned}
 \text{Electrical Efficiency} &= \frac{\text{Electrical Energy}}{\text{Mass of produced Hydrogen}} = \frac{E_{\text{cell}}It}{\frac{ItM}{nF}} = \frac{E_{\text{cell}}nF}{M} \\
 &= \frac{E_{\text{cell}} \text{ (V)} \times 2 \text{ (mol}_e\text{- mol}^{-1}_{\text{H}_2}) \times 96485 \text{ (C mol}_e^{-1}\text{)}}{2 \text{ (g mol}^{-1}_{\text{H}_2})} \times \frac{1000 \text{ (g)}}{1 \text{ (kg)}} \times \frac{1 \text{ (kWh)}}{3.6 \times 10^6 \text{ (C V)}} \\
 &= E_{\text{cell}} \text{ (V)} \times 26.801 \text{ (kWh kg}^{-1} \text{ V}^{-1}\text{)} \quad (\text{S18})
 \end{aligned}$$

where  $M$  is the molar mass of hydrogen gas,  $n$  is the number of moles of electrons consumed to produce a mole of hydrogen gas,  $F$  denotes Faraday's constant,  $t$  denotes the time of operation, while  $I$  and  $E_{\text{cell}}$  are the operating current and cell voltage.

### Cost of H<sub>2</sub> from AEMWE

Hydrogen cost is calculated based on the electrical efficiency in AEMWE and the electricity price (0.02 \$ kWh<sup>-1</sup> <sup>7</sup>), according to equation S19.

$$\begin{aligned}\text{Cost of H}_2 (\$ \text{ kg}^{-1}) &= \text{Electrical Efficiency (kWh kg}^{-1}) \times \text{Electricity price } (\$ \text{ kWh}^{-1}) \\ &= \text{Electrical Efficiency (kWh kg}^{-1}) \times 0.02 (\$ \text{ kWh}^{-1})\end{aligned}\quad (\text{S19})$$

### Faradaic efficiency in AEMWE

The amount of H<sub>2</sub> produced by AEMWE is determined by gas chromatography (GC, Shimadzu GC 2010), where 1.0 M KOH is circulated from the anode side, while Ar gas is circulated at a specific flow rate ( $v$ ) from the cathode side carrying H<sub>2</sub> gas in an online setup into the GC. The faradaic efficiency is calculated according to equation S20.

$$\begin{aligned}\text{Faradaic efficiency \%} &= \frac{\text{moles of H}_2}{\text{Theoretical moles of H}_2} \times 100\% = \frac{\left(\frac{PV}{RT}\right)_{\text{H}_2}}{\frac{It}{nF}} \times 100\% \\ &= \frac{\left(\frac{PV}{RT}\right)_{\text{H}_2} / V_{\text{total}}}{\left(\frac{It}{nF}\right) / V_{\text{total}}} \times 100\% = \frac{\left(\frac{PV\%}{RT}\right)_{\text{H}_2} \times v}{\left(\frac{I}{nF}\right)} \\ &= \frac{0.1316 \left(\frac{\text{min. A}}{\text{ml}}, \text{ at } 25^\circ \text{C}\right) \times V\%_{\text{H}_2} \times v \left(\frac{\text{ml}}{\text{min}}\right)}{I \text{ (A)}}\end{aligned}\quad (\text{S20})$$

Where  $V\%_{\text{H}_2}$  is the volume percentage of H<sub>2</sub> in the Ar and H<sub>2</sub> mixture,  $v$  is the gas flow rate in ml/min, and  $I$  is the applied current in A.

### IR and Mass-transfer free LSVs

To deconvolute the observed overpotential at the full cell and the AEMWE into its three originating types: ohmic, mass transfer, and activation, the following strategy is adopted. Firstly, raw LSV data are measured and depicted without  $IR$  compensation. Secondly, the  $IR$ -corrected LSV is drawn, where the difference between the two curves is the  $IR$  drop. Thirdly, the activation drop is calculated by the extension of the  $IR$ -compensated Tafel plot, which is measured at the activation-controlled region, to the high-current-density mass-transfer-controlled region, according to equation S21<sup>8</sup>. Thereby, an activation-controlled, mass-transfer-free and  $IR$ -free LSV is drawn.

$$|E_{IR \text{ and Mass free}}| = |E_{\text{Thermo}}| + \eta_{\text{activation}} = |E_{\text{Thermo}}| + b \log i - b \log i_0 \quad (\text{S21})$$

where  $E_{IR \text{ and Mass free}}$  is the  $IR$  and mass-transfer-free potential, which is drawn vs  $i$ , the raw measured current density, to construct the activation-controlled LSV.  $E_{\text{Thermo}}$  denotes the thermodynamic potential of water electrolysis at 60 °C, which equals  $-1.199$  V.  $b$  and  $-b \log i_0$  are Tafel slope and Tafel intercept, respectively. Finally, the mass transfer overpotential is considered as the drop between the  $IR$ -corrected and activation-controlled LSVs.

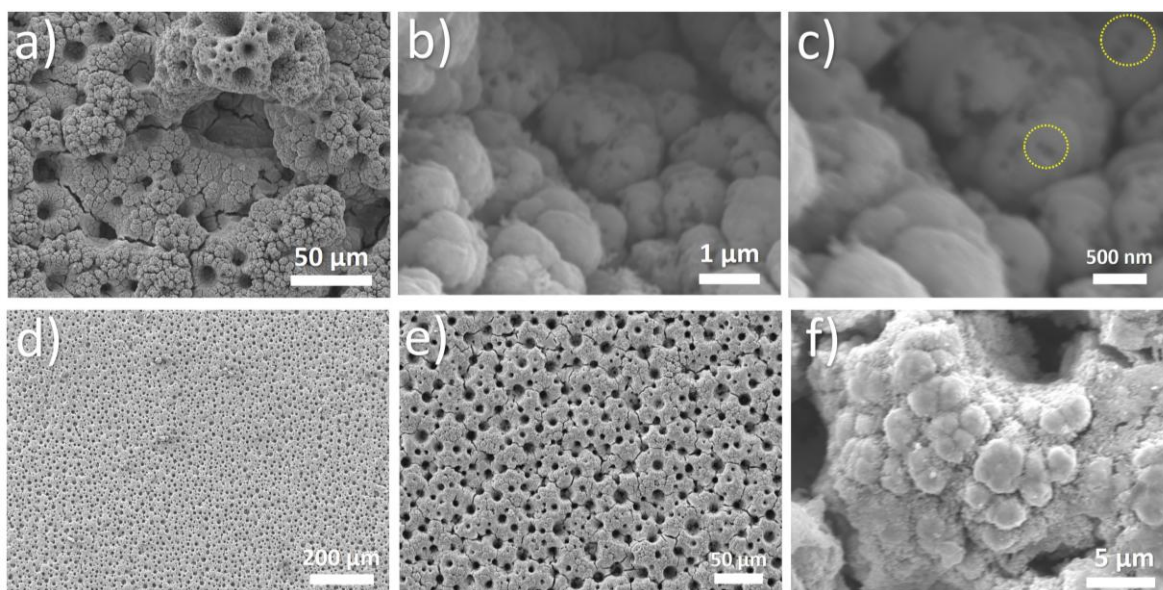

**Fig. S1.** SEM micrographs of the Ni/CeO<sub>x</sub> (2 A) film over Ni foam (a-c), over Al foil (d-f) at different magnifications.

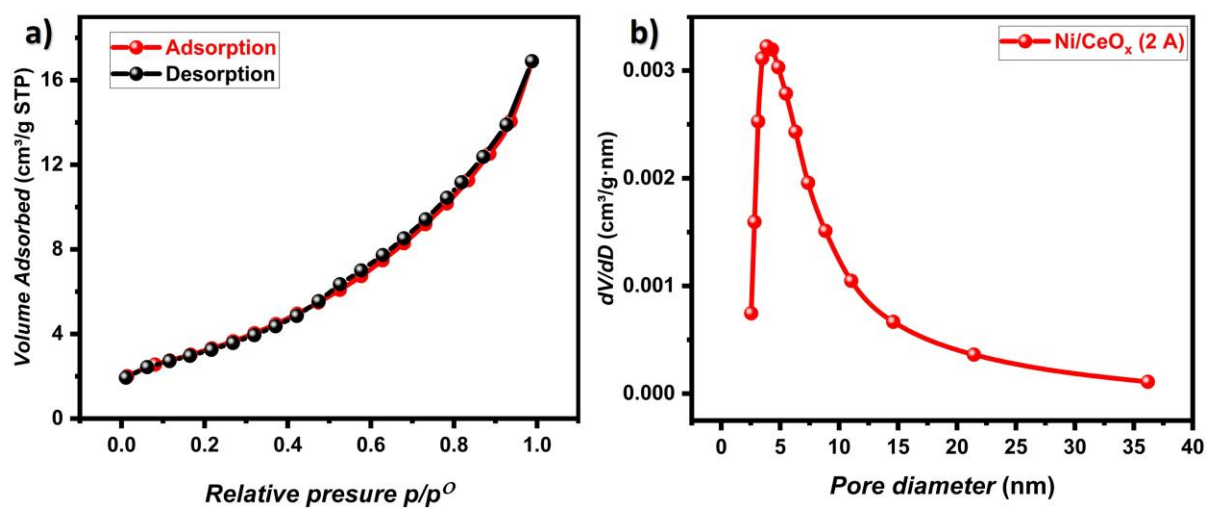

**Fig. S2.** a) N<sub>2</sub> adsorption/desorption (BET) isotherm and b) pore size distribution of the Ni/CeO<sub>x</sub> (2 Å) film.



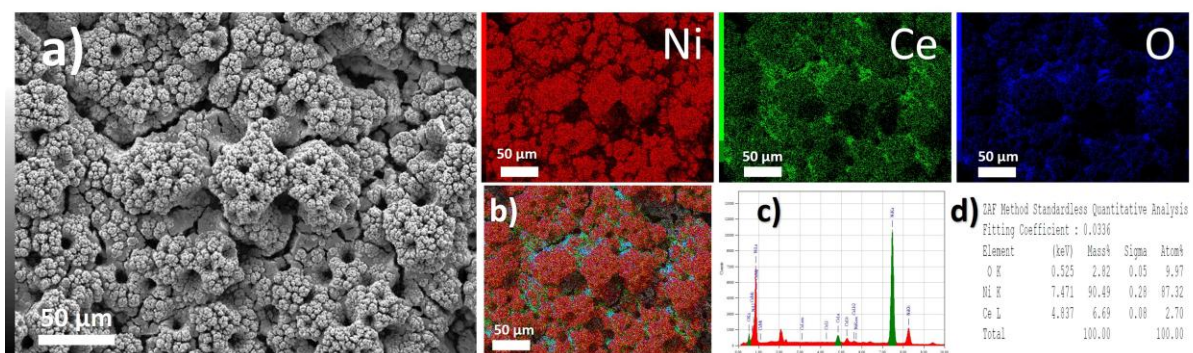

**Fig. S3.** a) SEM micrograph of the Ni/CeO<sub>x</sub> (2 Å) film and the corresponding EDS elemental mapping, b) overlay, c) spectra, and d) percentages.

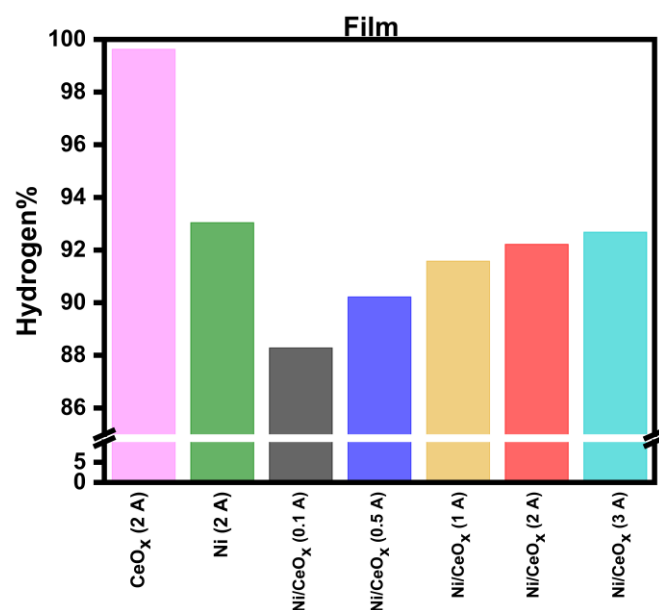

**Fig. S4.** Percentage of the charge consumed, according to the ICP-OES data, in generating hydrogen gas during electrodeposition.

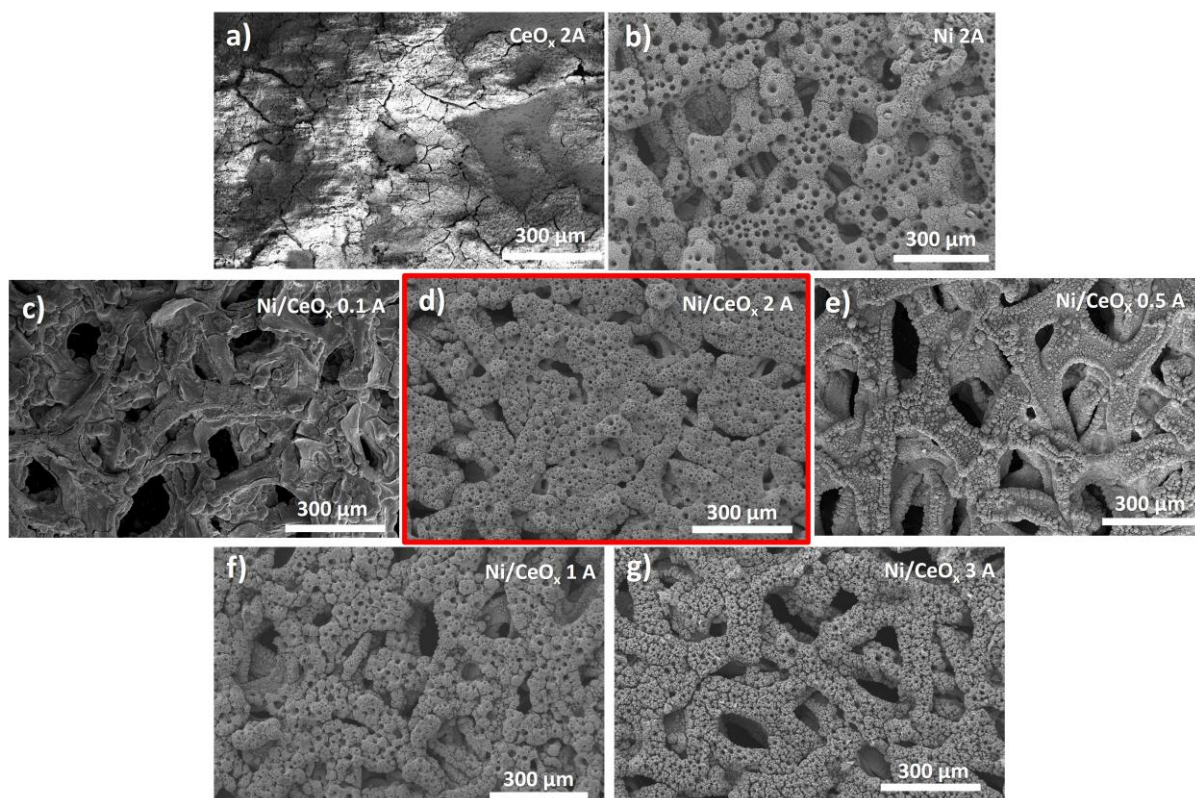

**Fig. S5.** SEM micrographs of a)  $\text{CeO}_x$  (2 A), b) Ni (2 A), c) Ni/ $\text{CeO}_x$  (0.1 A), d) Ni/ $\text{CeO}_x$  (2 A), e) Ni/ $\text{CeO}_x$  (0.5 A), f) Ni/ $\text{CeO}_x$  (1 A), and g) Ni/ $\text{CeO}_x$  (3 A) films.

**Note S1:**

For comparison, in the absence of either  $\text{Ni}^{2+}$  or  $\text{Ce}^{3+}$ ,  $\text{CeO}_x$  and Ni films are deposited, respectively, at  $2 \text{ A cm}^{-2}$  (Fig. S5). The  $\text{CeO}_x$  film appears yellowish-white in colour, matching the colour reported for the non-stoichiometric  $\text{CeO}_2$  material <sup>9</sup>, while Ni and Ni/ $\text{CeO}_x$  films appear brownish-black (Fig. S6). As expected, the  $\text{CeO}_x$  catalyst shows no uniform porosity but a tortuously grown layer with in-between cracks, similar to the morphology reported in the literature for electrodeposited  $\text{CeO}_2$  <sup>10</sup>, supporting the unsuitability of the employed deposition bath and technique (DHBT) for building macroporous Ce films (Fig. S7). SEM-EDS of the  $\text{CeO}_x$  catalyst shows a uniform distribution of Ce and O along the film, supporting the formation of cerium oxides (Fig. S7). The deposition faradaic efficiency is 0.37% only, i.e., most of the passing charge is evolving hydrogen gas.

Conversely, the deposited Ni catalyst exhibits the typical macroporous morphology expected, with relatively wider macropores, compared to the Ni/ $\text{CeO}_x$  (2 A) film, with diameters spanning from  $52 \mu\text{m}$  to  $140 \text{ nm}$ , (Fig. S5&8). This implies a higher tendency for the generation of larger bubbles in the absence of Ce ions during deposition. Hydrogen generation consumes 93.04% of the passing charge during the deposition, according to ICP-OES data. Ni film particles are cauliflower-like with minimal O content (2.5 atomic%), see SEM-EDS data in Fig. S8, likely due to oxidation of the top surface of Ni by atmospheric air <sup>11,12</sup>. This data confirms the successful formation of Ni in metallic form by the employed synthesis strategy.

For Ni/ $\text{CeO}_x$  films, notable distinctions in morphologies are observed when different deposition current densities are applied (Fig. S5). Ni/ $\text{CeO}_x$  (0.1 A) film lacks porosity, closely resembling the morphology of the  $\text{CeO}_x$  film (Fig. S9). This implies that the bubble generation

rate at this current density is insufficient to create macropores or prevent particle growth and linkage. The elemental distribution maps from SEM-EDS reveal that O sites surround Ce sites, endorsing the formation of cerium oxides. As for Ni/CeO<sub>x</sub> (0.5 A), the morphology still lacks porosity with several small cauliflower-like particles dominating, similar to those observed for Ni film (Fig. S10). The overlaid SEM-EDS distribution of elements discloses the consistent coexistence of Ce and O, aligning with observations from the other films. Conversely, macropores begin to emerge with Ni/CeO<sub>x</sub> (1 A). These macropores (Fig. S11) are fewer and wider than those observed for Ni/CeO<sub>x</sub> (2 A), reflecting the lower rate of hydrogen evolution during deposition. In contrast, a higher number of narrower macropores are observed for Ni/CeO<sub>x</sub> (3 A) due to the higher rate of hydrogen bubbling (Fig. S12). SEM-EDS data for both Ni/CeO<sub>x</sub> (1 A) and (3 A) confirm the convergence of Ce and O.

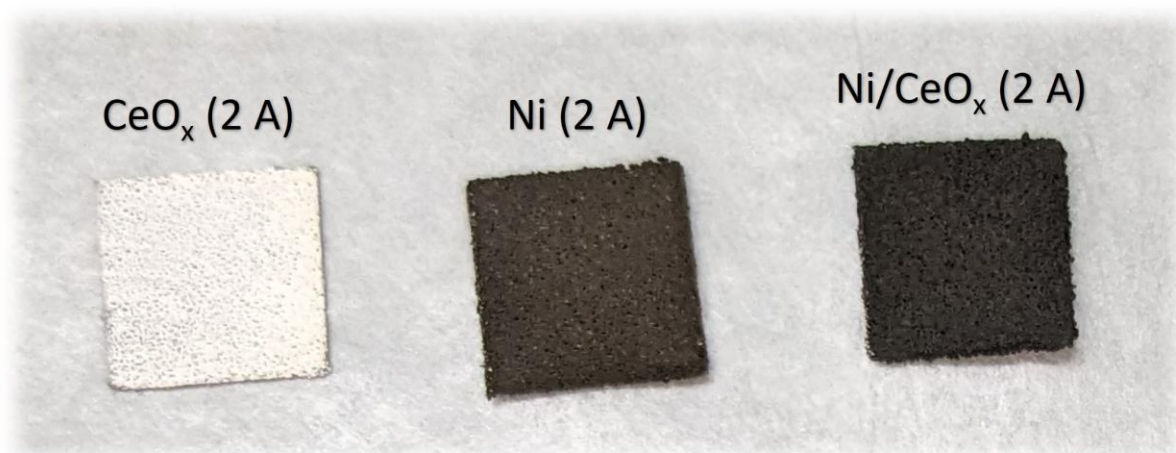

**Fig. S6.** Photos of CeO<sub>x</sub> (2 A), Ni (2 A), and Ni/CeO<sub>x</sub> (2 A) films.

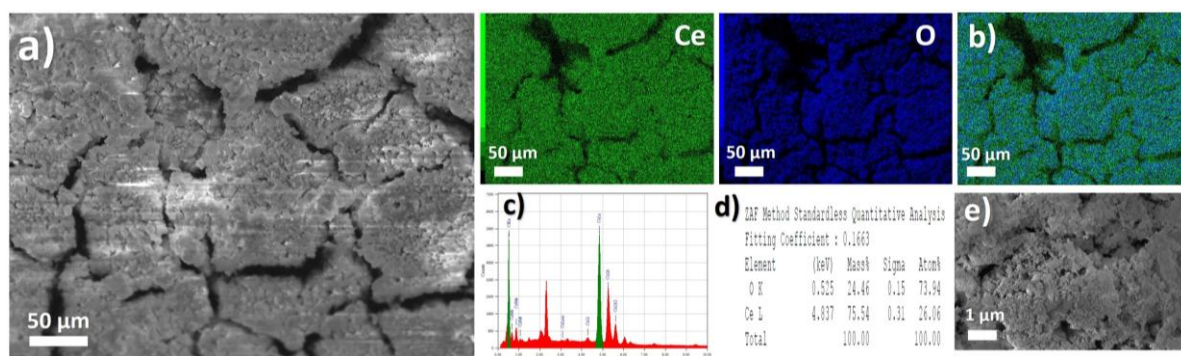

**Fig. S7.** a) SEM micrograph and the corresponding EDS elemental mapping, b) overlay, c) spectra, d) percentages, and e) magnified SEM micrograph of the CeO<sub>x</sub> (2 A) film.



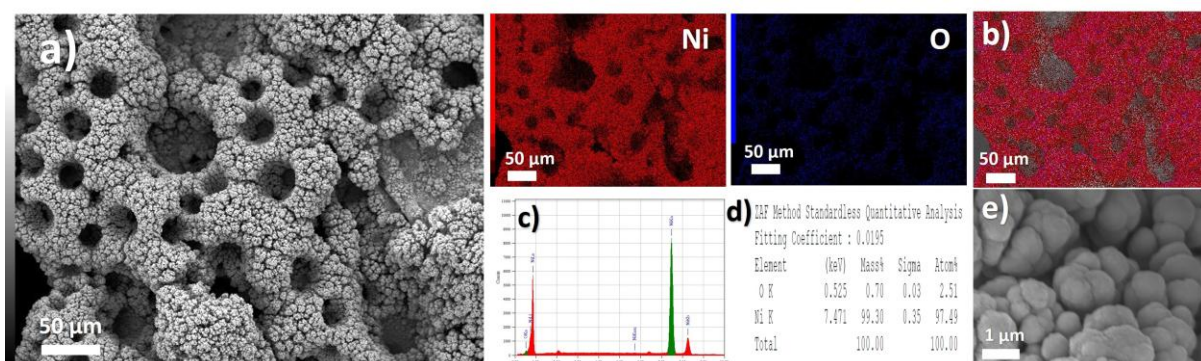

**Fig. S8.** a) SEM micrograph and the corresponding EDS elemental mapping, b) overlay, c) spectra, d) percentages, and e) magnified SEM micrograph of the Ni (2 A) film.

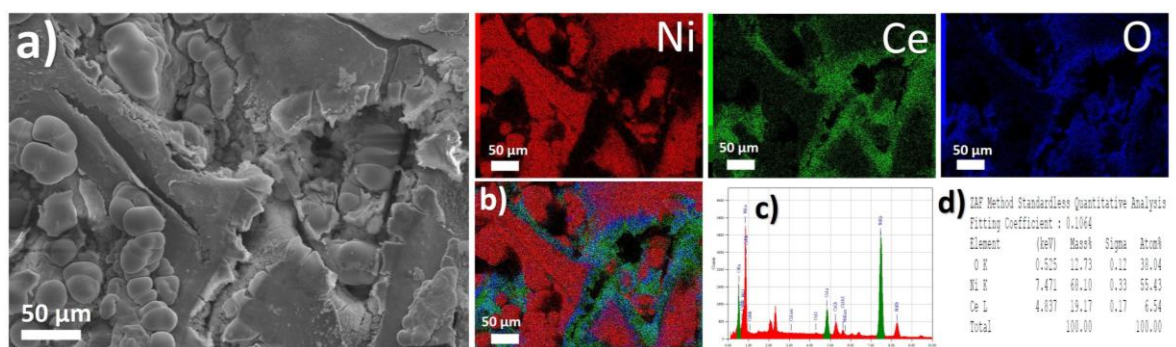

**Fig. S9.** a) SEM micrograph of the Ni/CeO<sub>x</sub> (0.1 A) film and the corresponding EDS elemental mapping, b) overlay, c) spectra, and d) percentages.



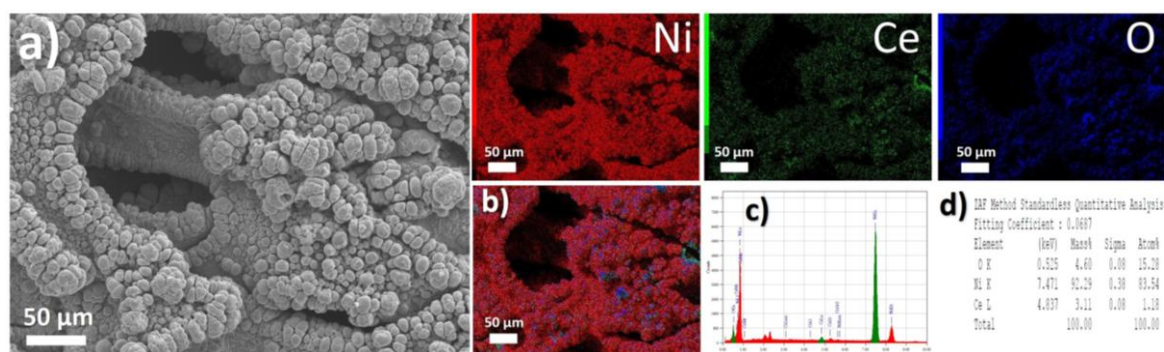

**Fig. S10.** a) SEM micrograph of the Ni/CeO<sub>x</sub> (0.5 A) film and the corresponding EDS elemental mapping, b) overlay, c) spectra, and d) percentages.

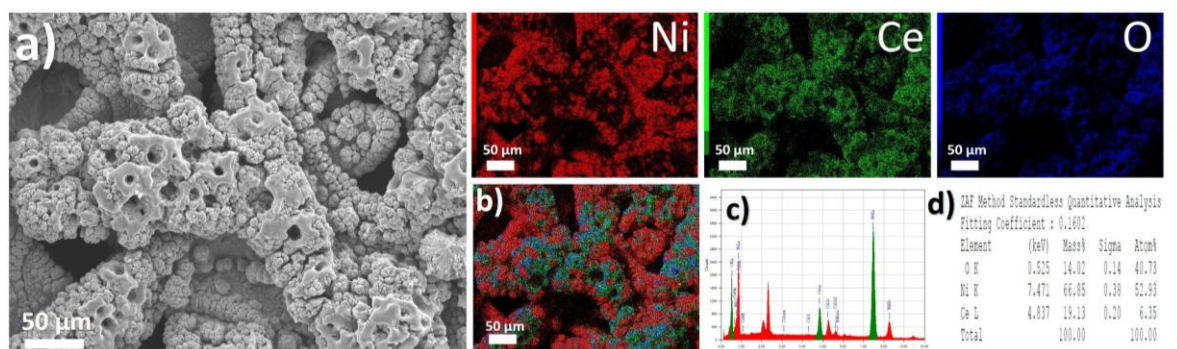

**Fig. S11.** a) SEM micrograph of the Ni/CeO<sub>x</sub> (1 A) film and the corresponding EDS elemental mapping, b) overlay, c) spectra, and d) percentages.

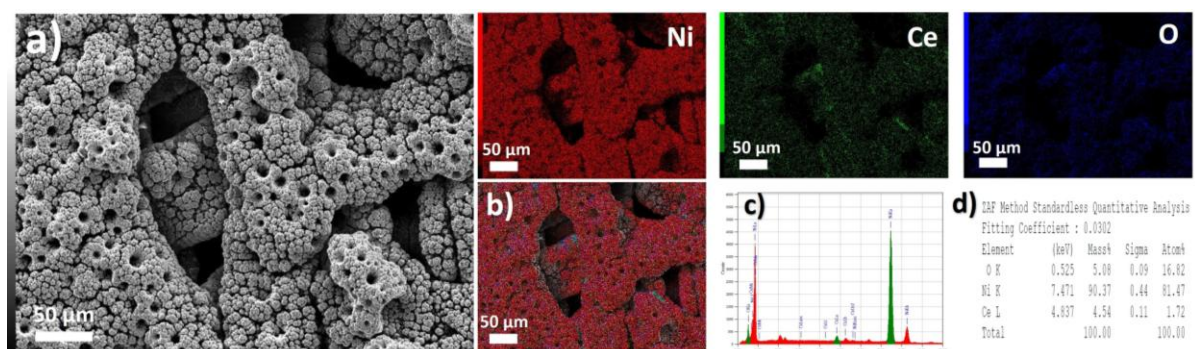

**Fig. S12.** a) SEM micrograph of the Ni/CeO<sub>x</sub> (3 A) film and the corresponding EDS elemental mapping, b) overlay, c) spectra, and d) percentages.

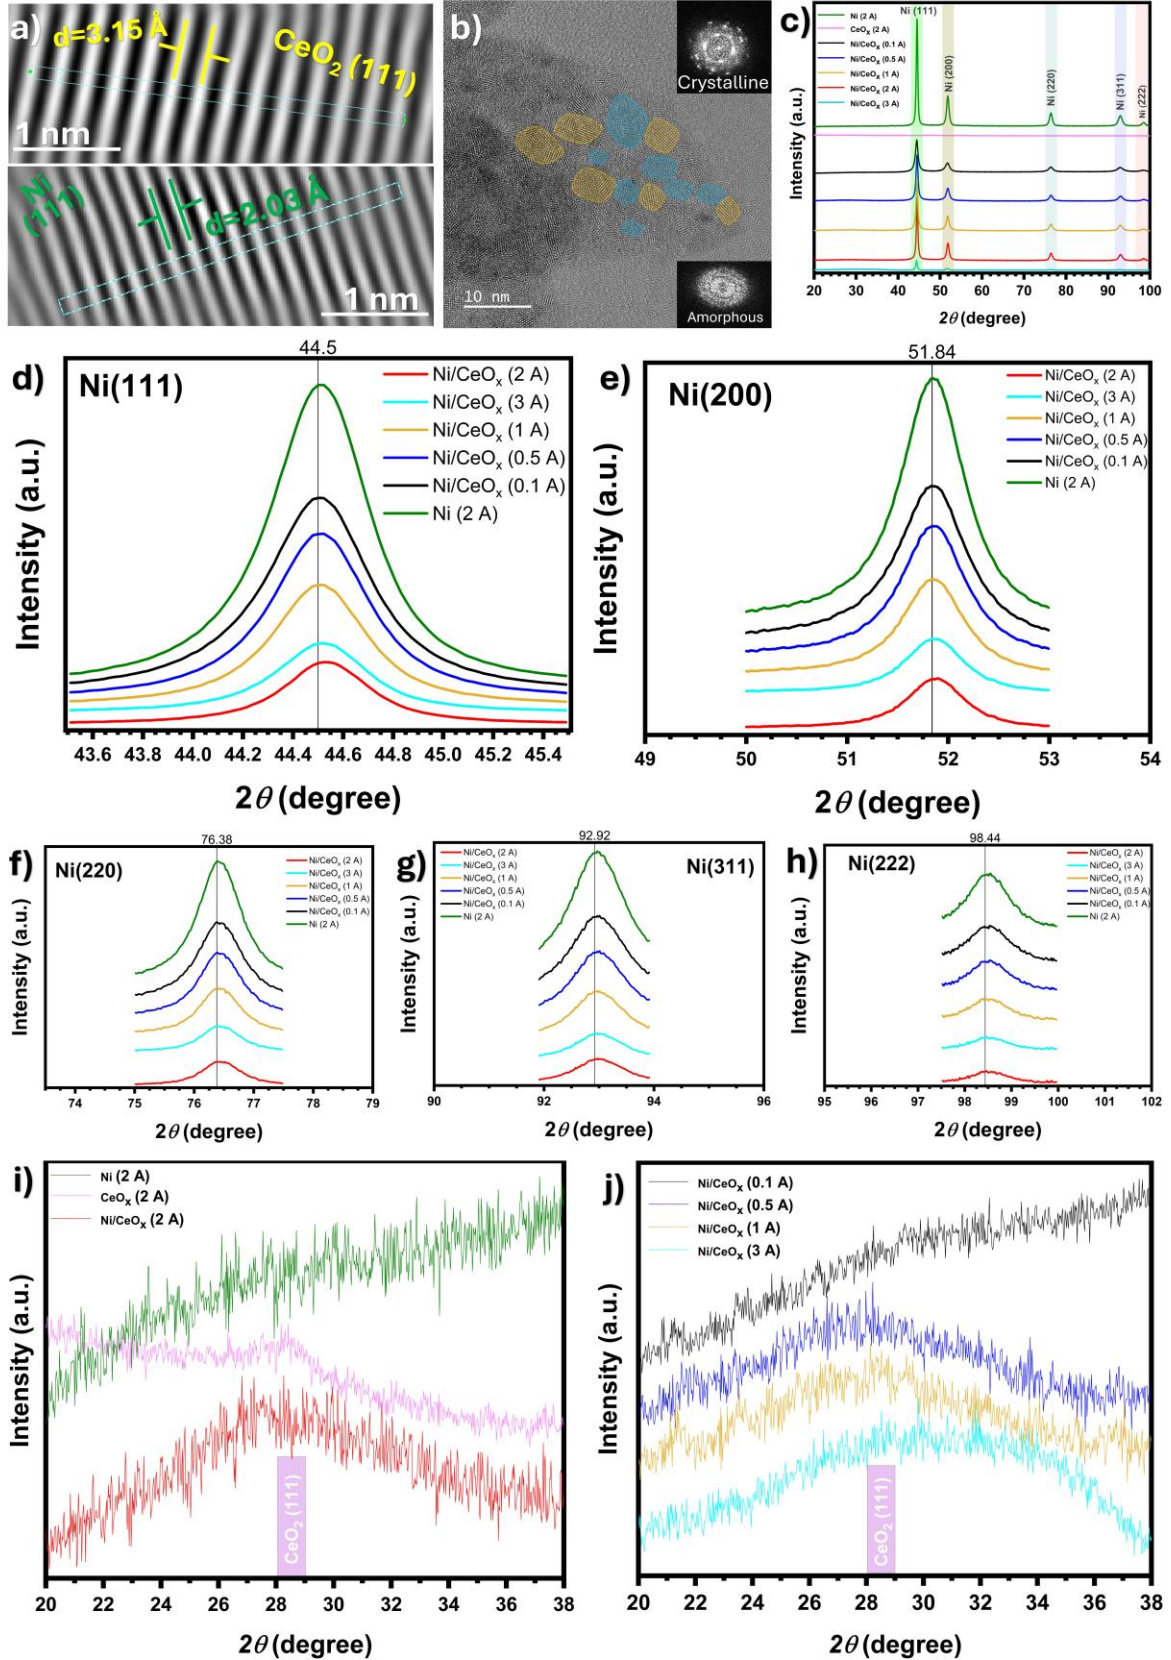

**Fig. S13.** a) Inverse FFT images of the (111) facets of both cubic Ni and cubic CeO<sub>x</sub> in Ni/CeO<sub>x</sub> (2 Å). b) Crystalline (orange) and amorphous (blue) regions in HRTEM image of Ni/CeO<sub>x</sub> (2 Å), insets show the FFT patterns of both regions. c) XRD patterns. d-j) Zoomed XRD patterns of the designed Ni/CeO<sub>x</sub>, Ni, CeO<sub>x</sub> films.

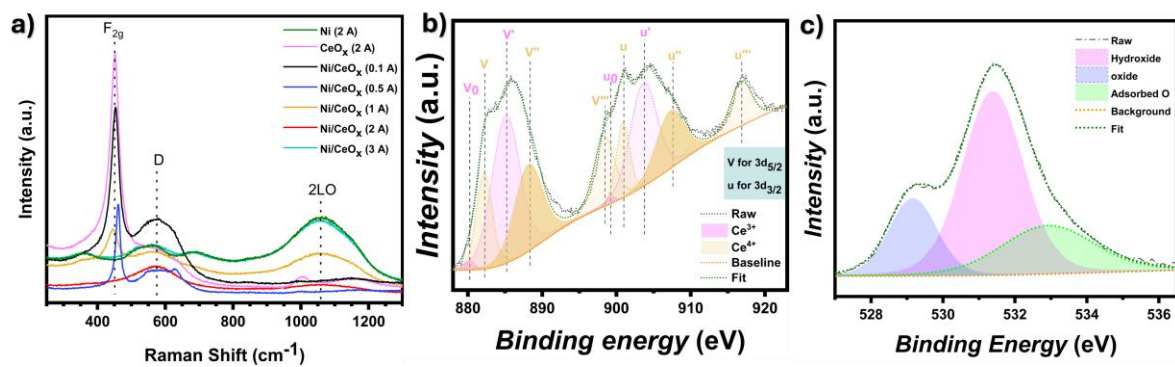

**Fig. S14.** a) Raman spectra of the designed Ni/CeO<sub>x</sub>, Ni, CeO<sub>x</sub> films. b-c) XPS spectra of the CeO<sub>x</sub> (2 Å) film: b) Ce 3d spectra and c) O 1s spectra.



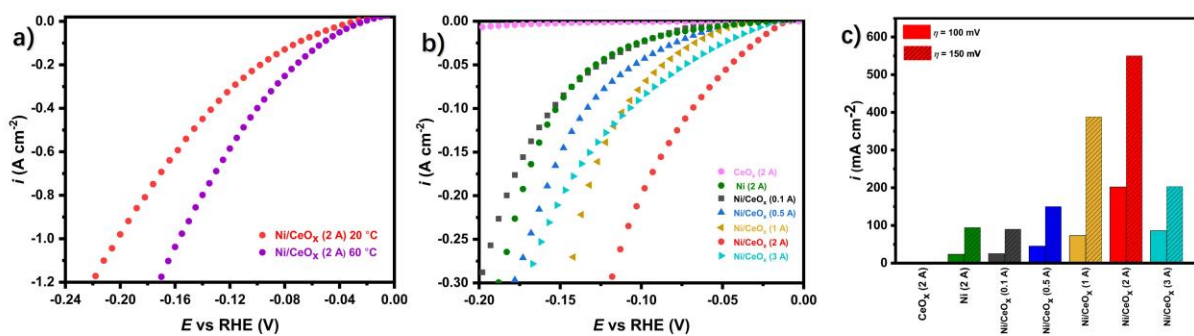

**Fig. S15.** a) HER LSVs of Ni/CeO<sub>x</sub> (2 A) at 20 and 60 °C. b) HER LSVs of the deposited films at 20 °C. c) HER current densities of the deposited films at 100 and 150 overpotentials at 20 °C.

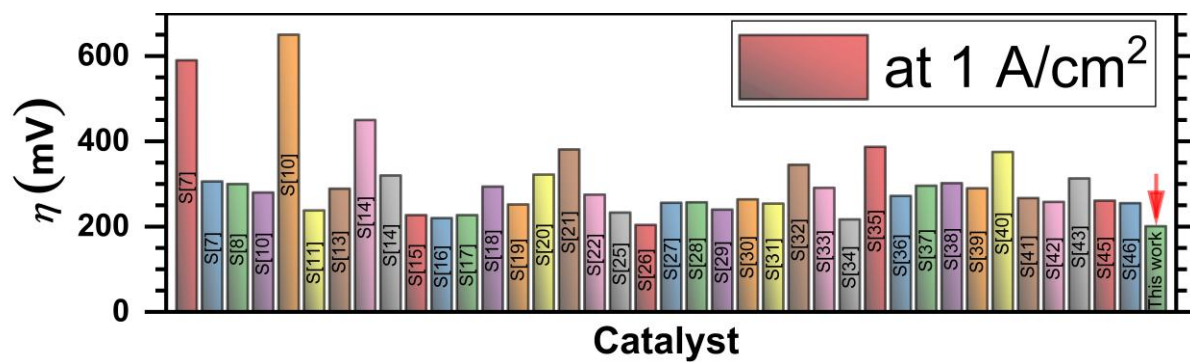

**Fig. S16.** Comparison between  $\eta_{1000}$  for HER electrocatalysts in 1 M KOH.

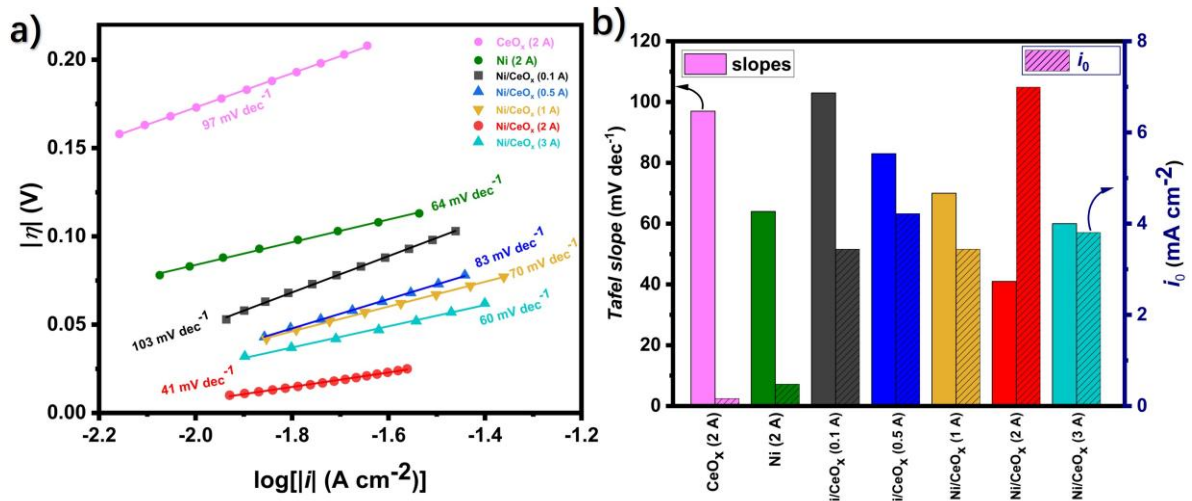

**Fig. S17.** a) Tafel plots of the deposited films. b) Tafel slopes and exchange current densities of the deposited films.



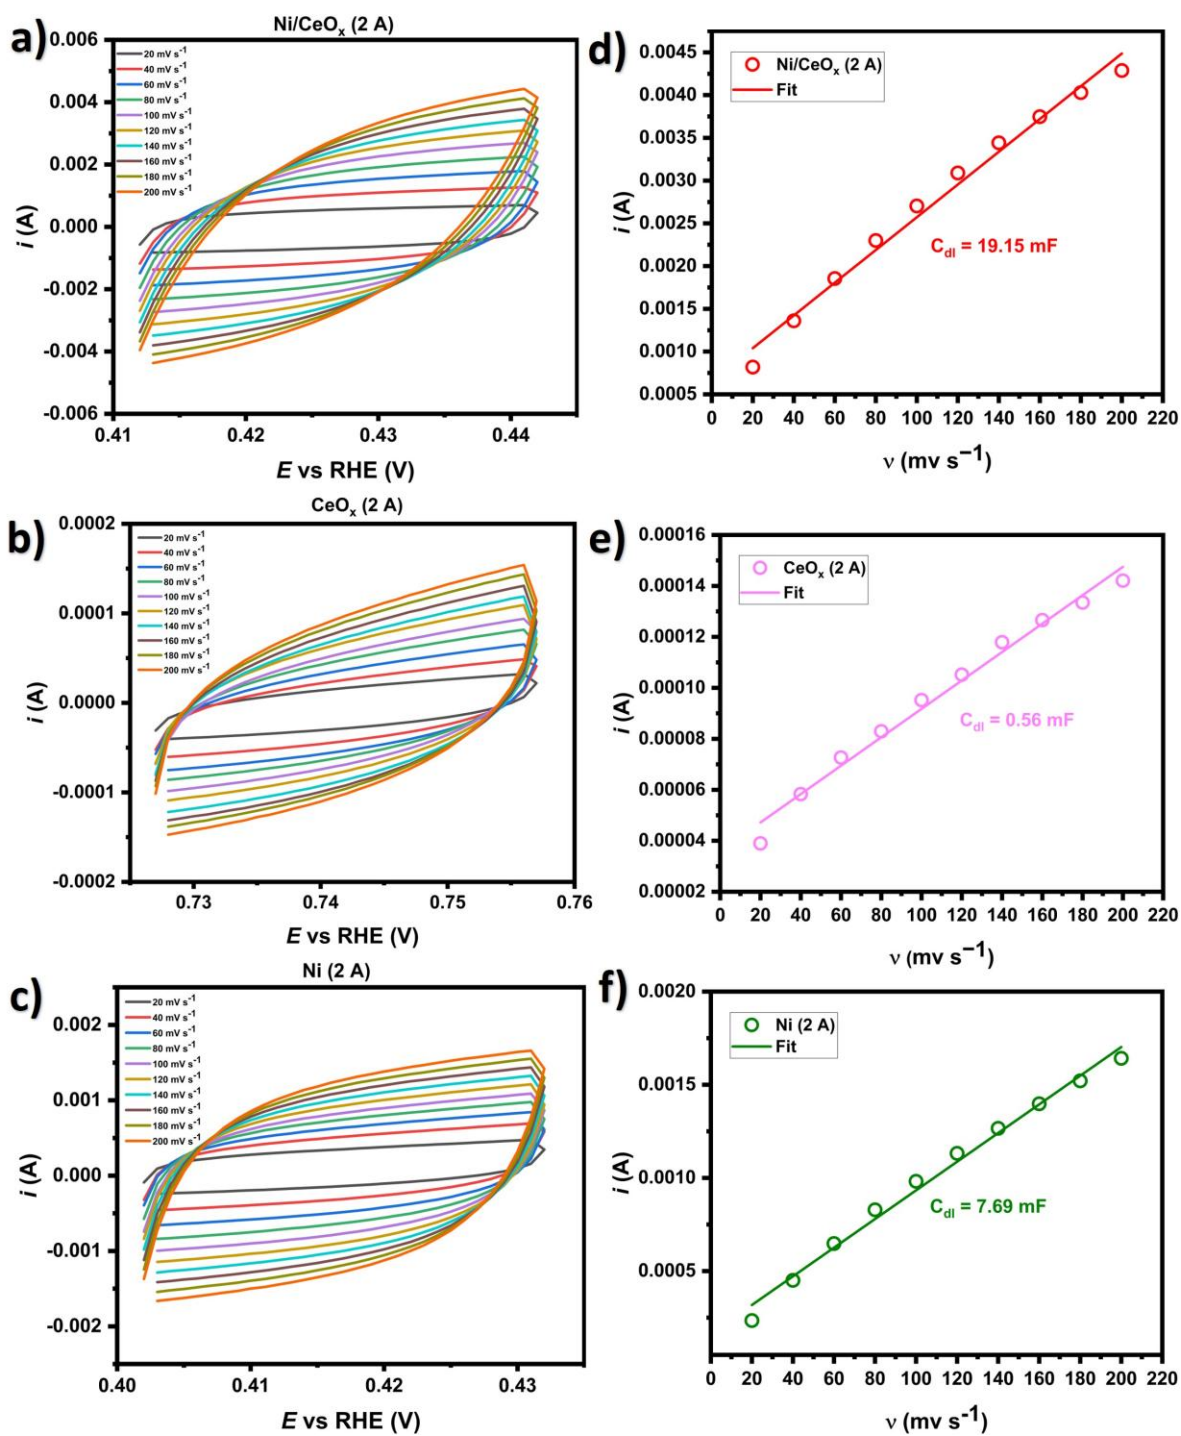

**Fig. S18.** a-c) Capacitive CVs in 1.0 M KOH at different potential scan rates (10:100 mV s<sup>-1</sup>). d-f) The variation of capacitive current with potential scan rate for the Ni/CeO<sub>x</sub> (2 A), CeO<sub>x</sub> (2 A), and Ni (2 A) films.

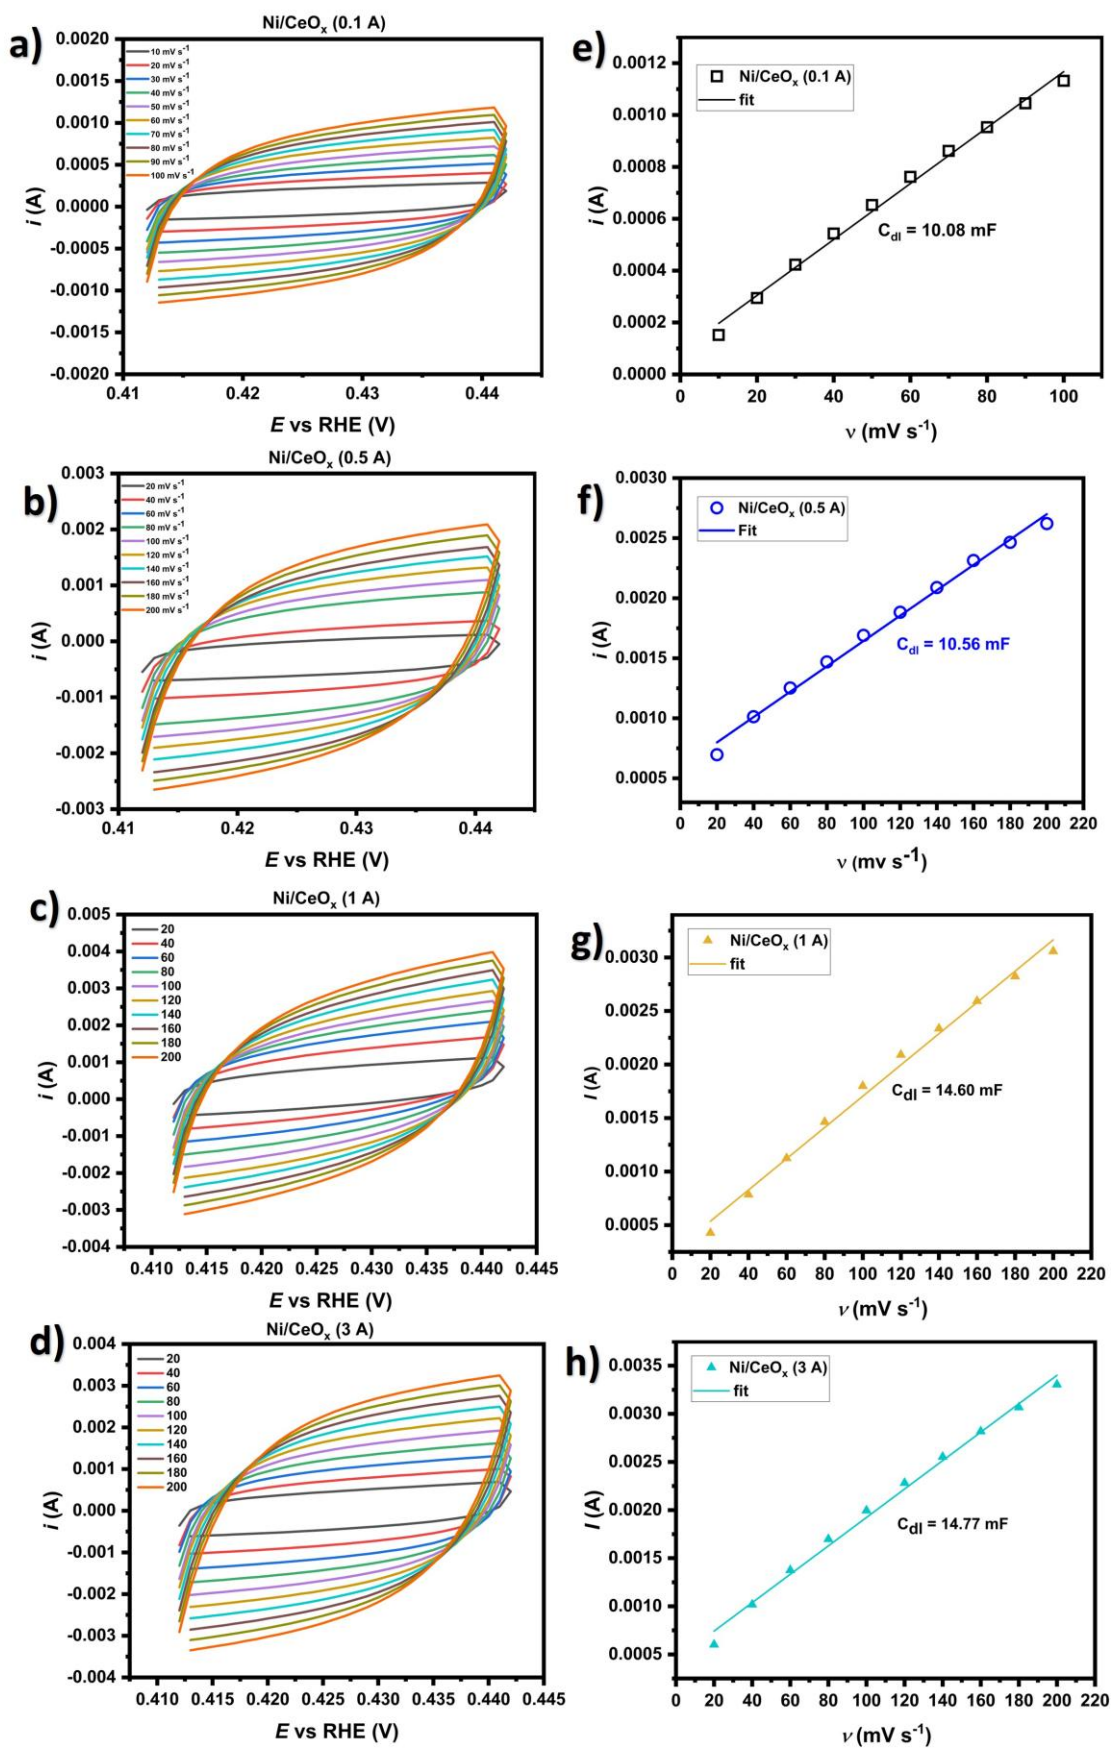

**Fig. S19.** a-d) Capacitive CVs in 1.0 M KOH at different potential scan rates (10:100 mV s<sup>-1</sup>). e-h) The variation of capacitive current with potential scan rate for the Ni/CeO<sub>x</sub> (0.1 A), Ni/CeO<sub>x</sub> (0.5 A), Ni/CeO<sub>x</sub> (1 A), and Ni/CeO<sub>x</sub> (3 A) films.

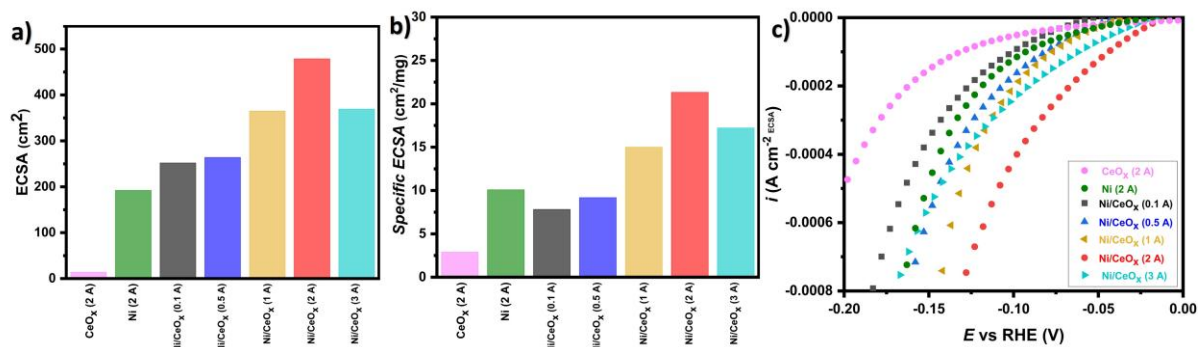

**Fig. S20.** a) *ECSA* values. b) Specific *ECSA* values. c) LSVs, normalized to *ECSA*, in 1.0 M KOH at a potential scan rate of 10 mV s<sup>-1</sup> of the designed electrocatalysts.

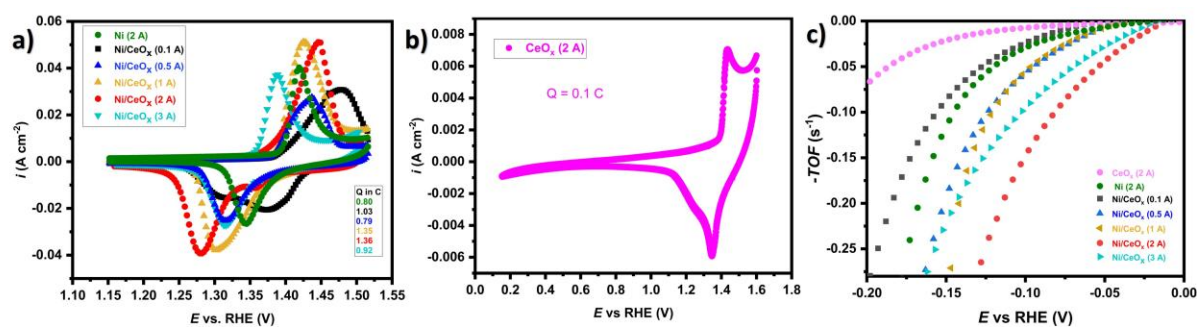

**Fig. S21.** a-b) CVs of the designed films. b) CV of CeO<sub>x</sub> (2 A) film. C)  $TOFs$  of the designed electrocatalysts.

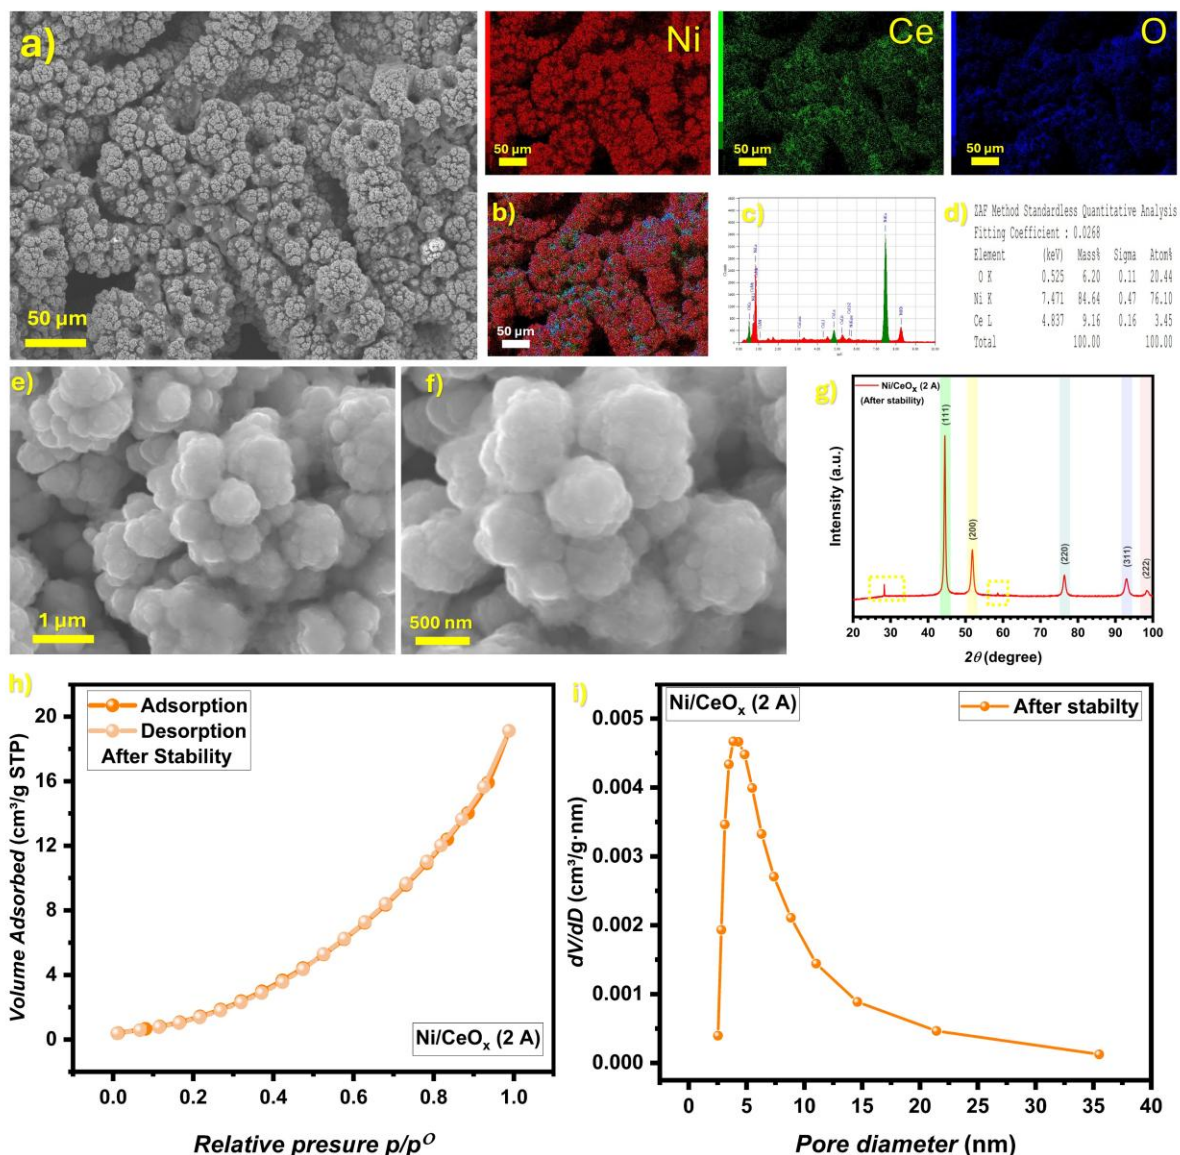

**Fig. S22.** After stability a) SEM micrograph and the corresponding EDS elemental mapping, b) overlay, c) spectra, and d) percentages. e-f) Other SEM at different magnifications. g) XRD pattern of the Ni/CeO<sub>x</sub> (2 A) film (all after HER operation). h) N<sub>2</sub> adsorption/desorption (BET) isotherm and i) pore size distribution of the Ni/CeO<sub>x</sub> (2 A) film after stability.



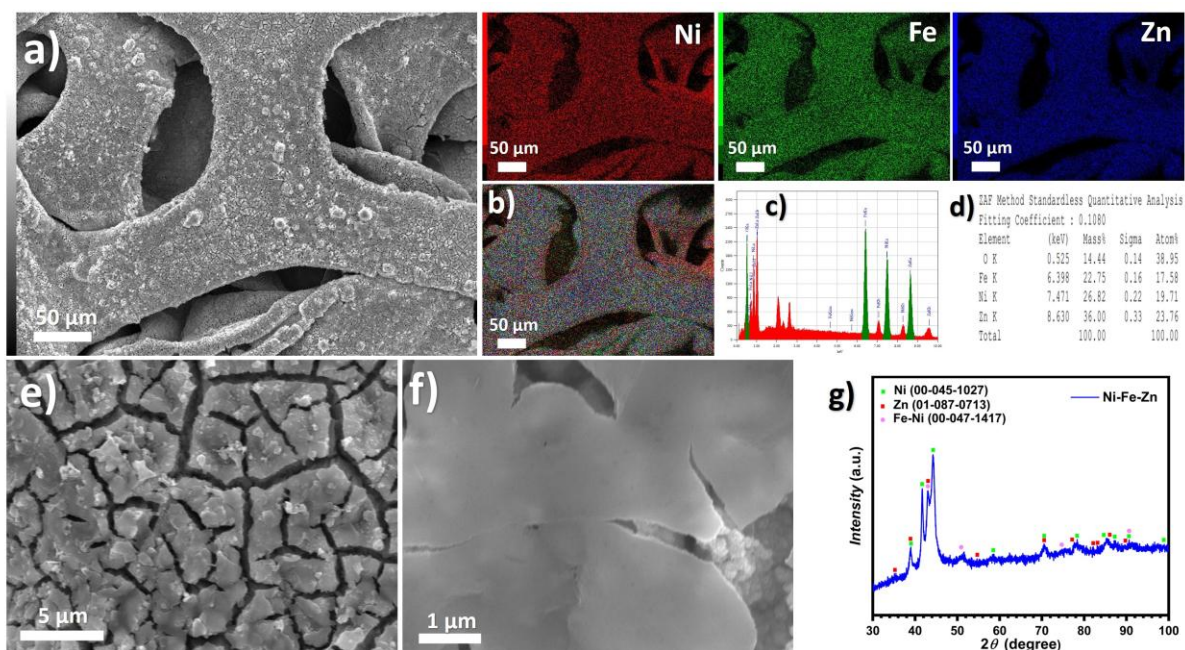

**Fig. S23.** a) SEM micrograph and the corresponding EDS elemental mapping, b) overlay, c) spectra, and d) percentages. e-f) other SEM micrographs at different magnifications. g) XRD pattern of the Ni-Fe-Zn film.

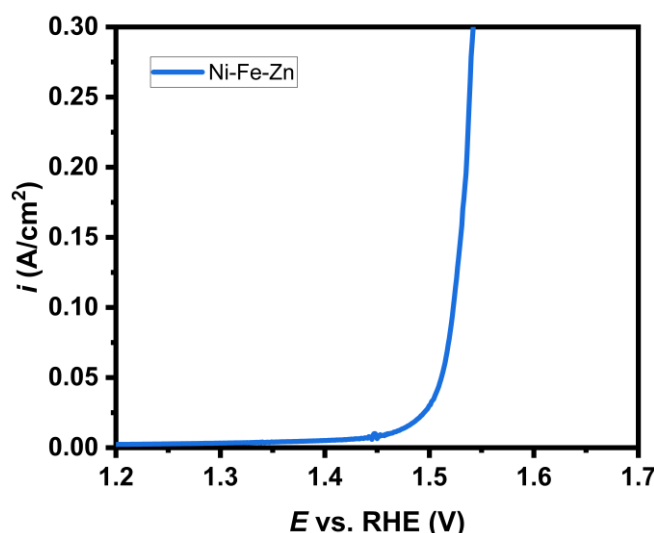

**Fig. S24.** OER LSV of Ni-Fe-Zn catalyst at 20 °C.

**Note S2:**

NiFe-based materials have been reported to lead the non-precious electrocatalysts used for OER in alkaline media <sup>13,14</sup>. Herein, a Ni-Fe-Zn OER catalyst is designed, with a near 1:1:1 metal percentage observed from SEM-EDS data (Fig. S23), approaching the molar ratio of precursor ions in the deposition bath. The designed catalyst demonstrates remarkable activity, delivering 300 mA cm<sup>-2</sup> at an overpotential of 312 mV (Fig. S24), indicating superb OER activity <sup>15,16</sup>. A morphology of cauliflower-like particles wrapped by sheets with various interstitial cracks (Fig. S23e&f) is likely to contribute to the enhanced activity by providing disconnection sites that inhibit oxygen bubble coalescence and reduce mass transfer resistance. The obtained XRD pattern reveals the coexistence of multiple phases (Fig. S23g). The inclusion of Zn<sup>+2</sup> ions in the deposition bath, and consequently, Zn presence in the designed catalyst, aims to lower the surface roughness of the Ni-Fe catalyst that causes membrane rupture and short circuits when assembled in AEMWE in the absence of Zn. Interestingly, Ni-Fe-Zn shows similar OER performance, while addressing the membrane-related challenges.

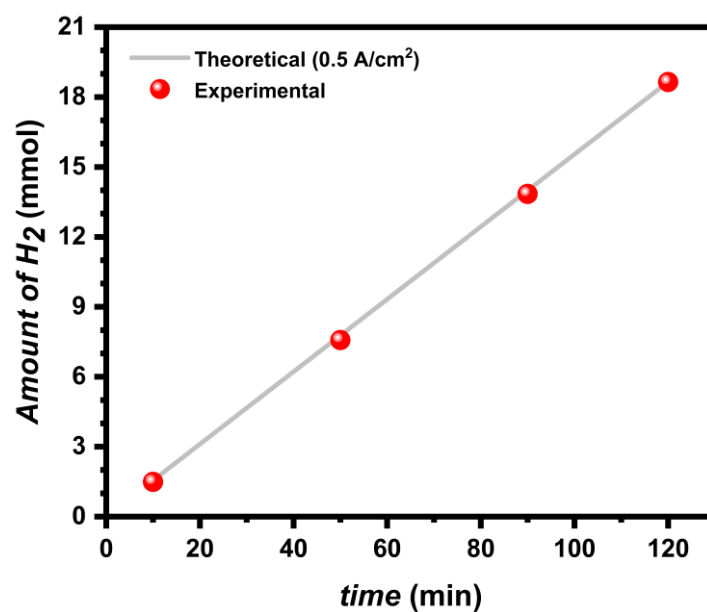

**Fig. S25.** Theoretical and experimental amount of H<sub>2</sub> product at 0.5 A cm<sup>-2</sup> in AEMWE.



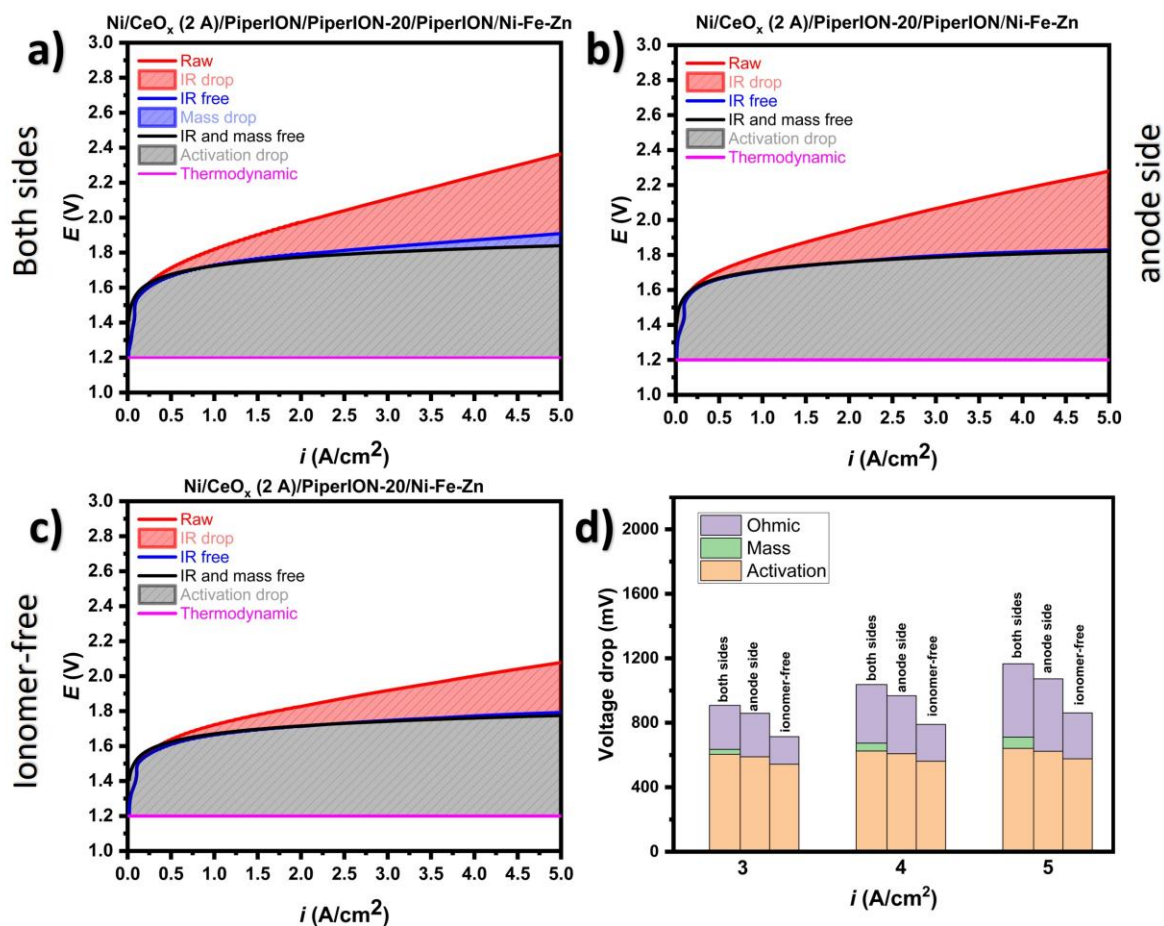

**Fig. S26.** Deconvoluted LSV of AEMWEs with PiperION-20 membrane at 60 °C when a) PiperION ionomer is at both cathodic and anodic sides. b) at anodic sides only, and c) no PiperION ionomer is added. d) A comparison between the contributing overpotentials at different current densities for the three AEMWE configurations.

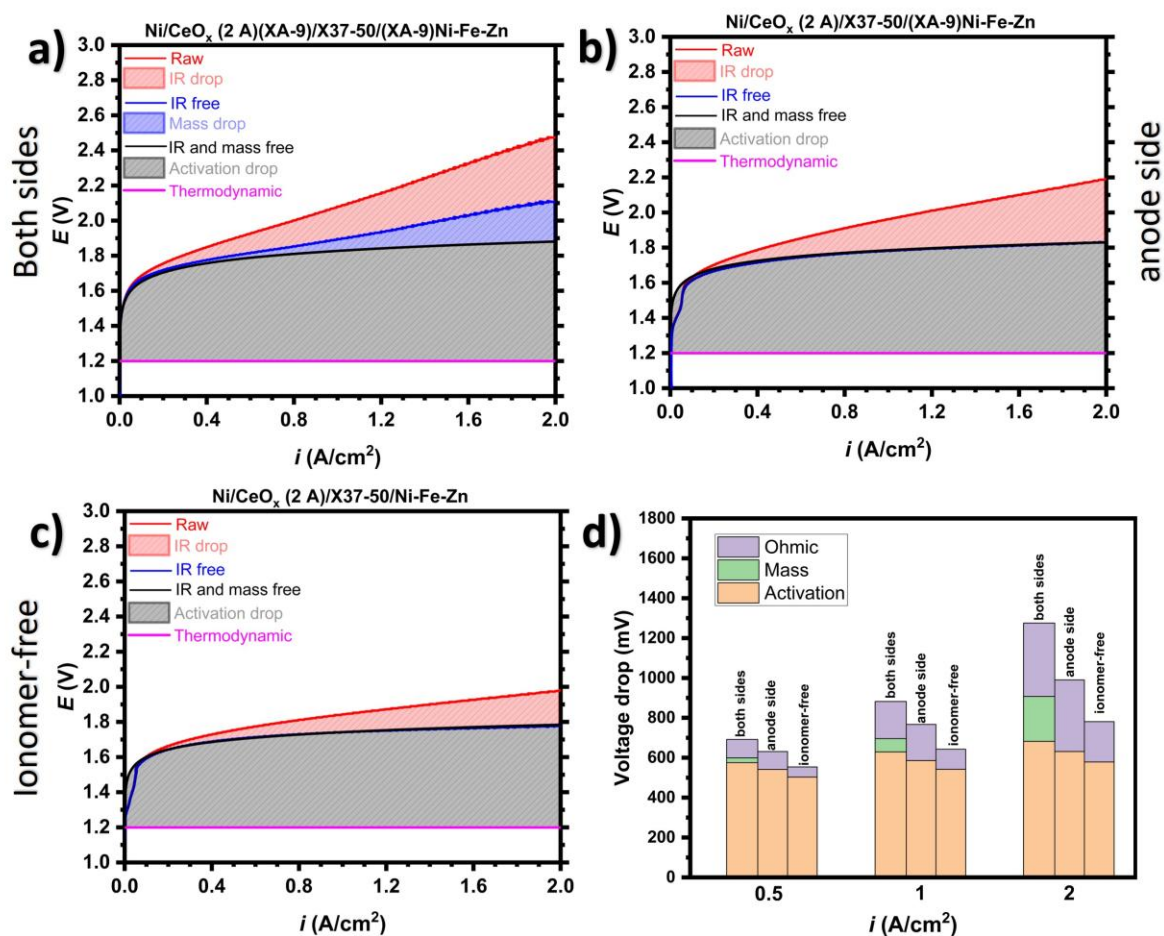

**Fig. S27.** Deconvoluted LSV of AEMWEs with X37-50 membrane at 60 °C when a) XA-9 ionomer is at both cathodic and anodic sides. b) at anodic sides only, and c) no XA-9 ionomer is added. d) A comparison between the contributing overpotentials at different current densities for the three AEMWE configurations.

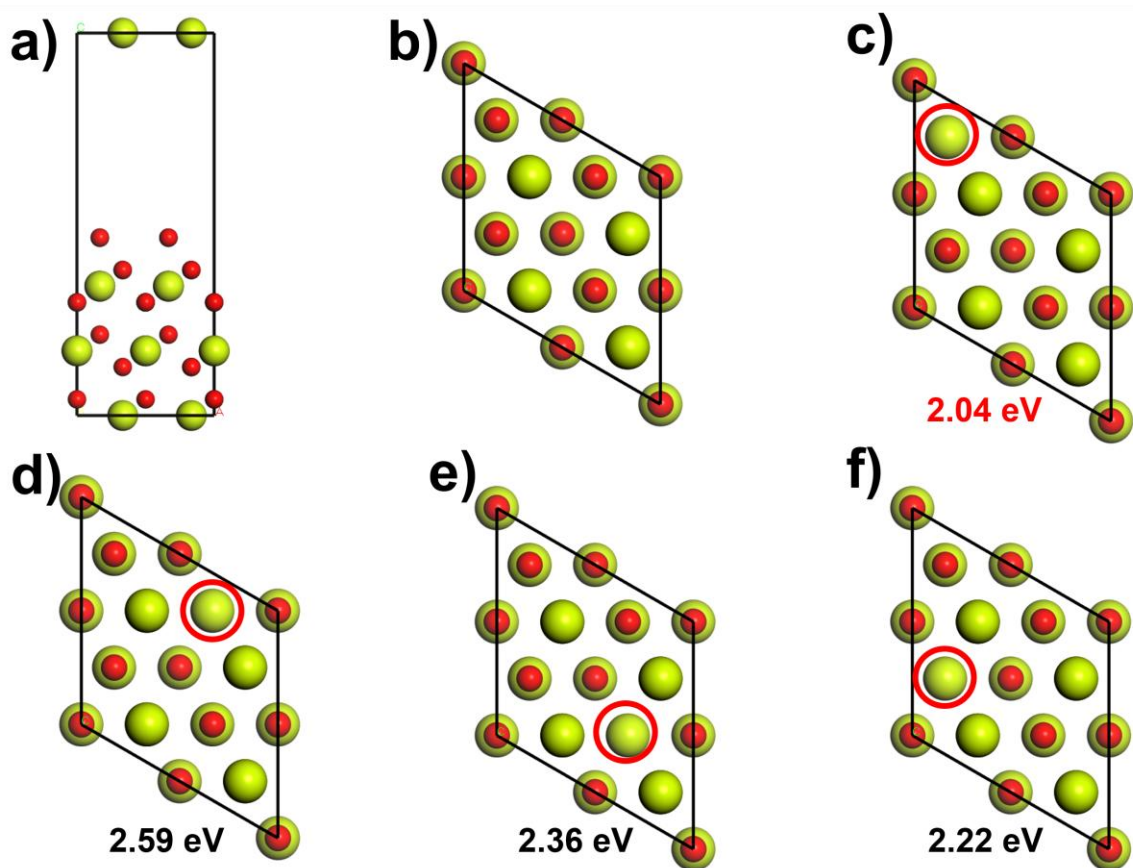

**Fig. S28.** a) Front view and b) Top view of  $\text{CeO}_2$ . (c-f) The four possible structures of  $\text{CeO}_{2-\delta}$  and their corresponding chemical formation energies.

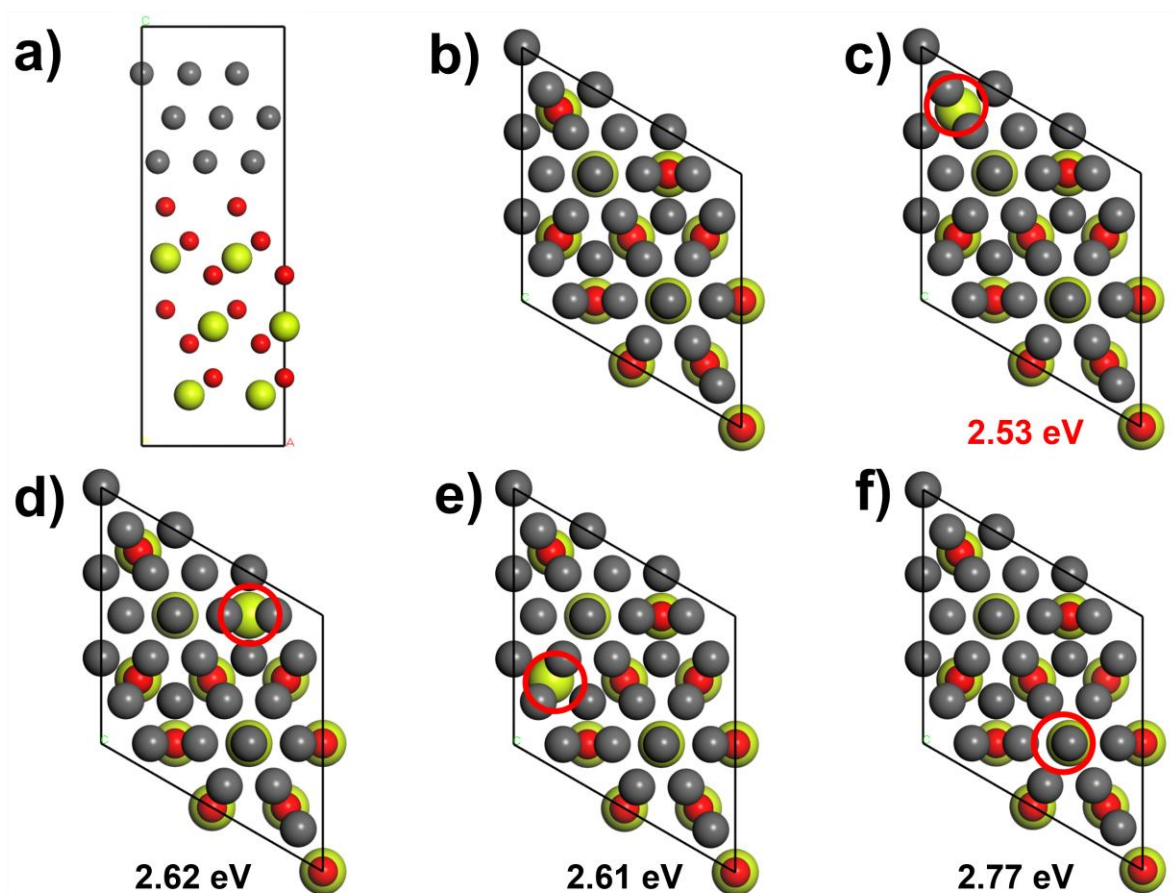

**Fig. S29.** a) Front view and b) Top view of Ni/CeO<sub>2</sub>. (c-f) The four possible structures of Ni/CeO<sub>2-δ</sub> and their corresponding chemical formation energies.

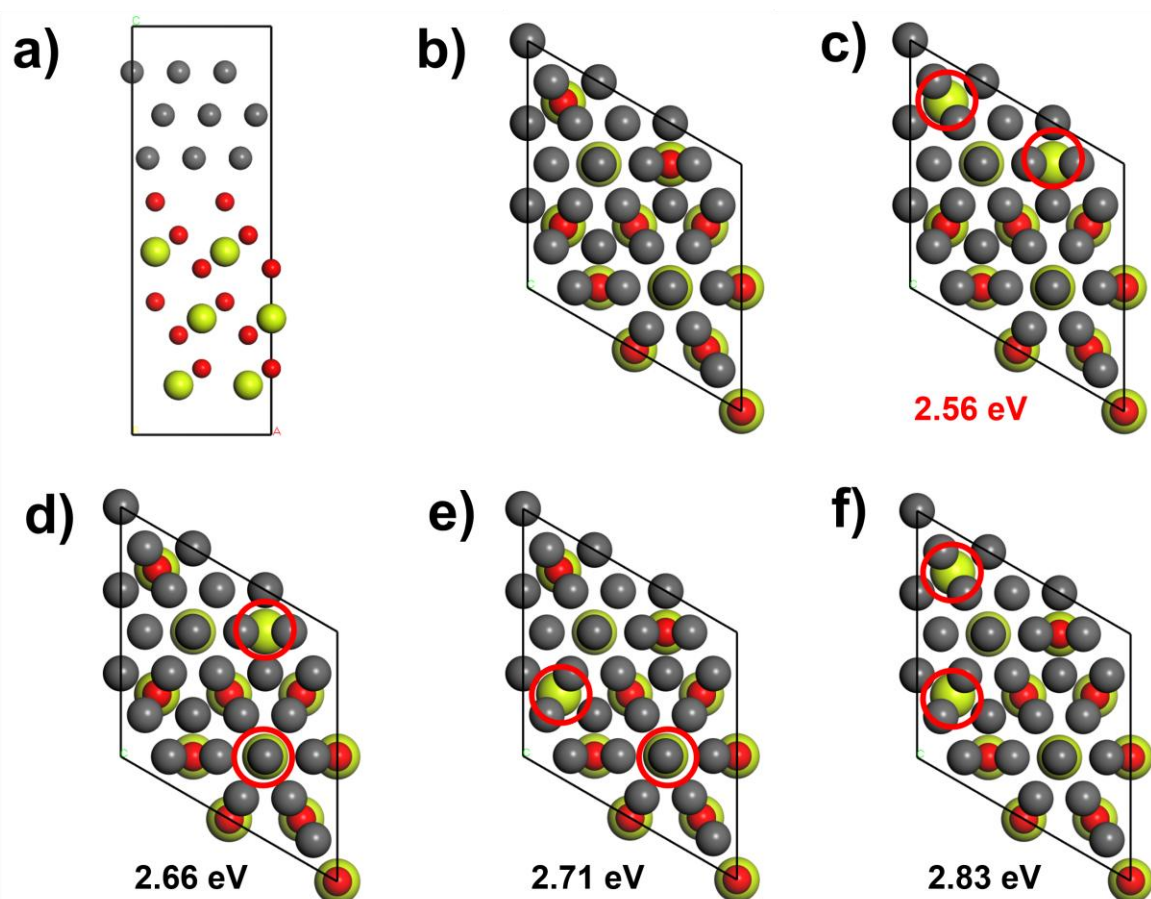

**Fig. S30.** a) Front view and b) Top view of Ni/CeO<sub>2</sub>. (c-f) The four possible structures of Ni/CeO<sub>2-28</sub> and their corresponding chemical formation energies.

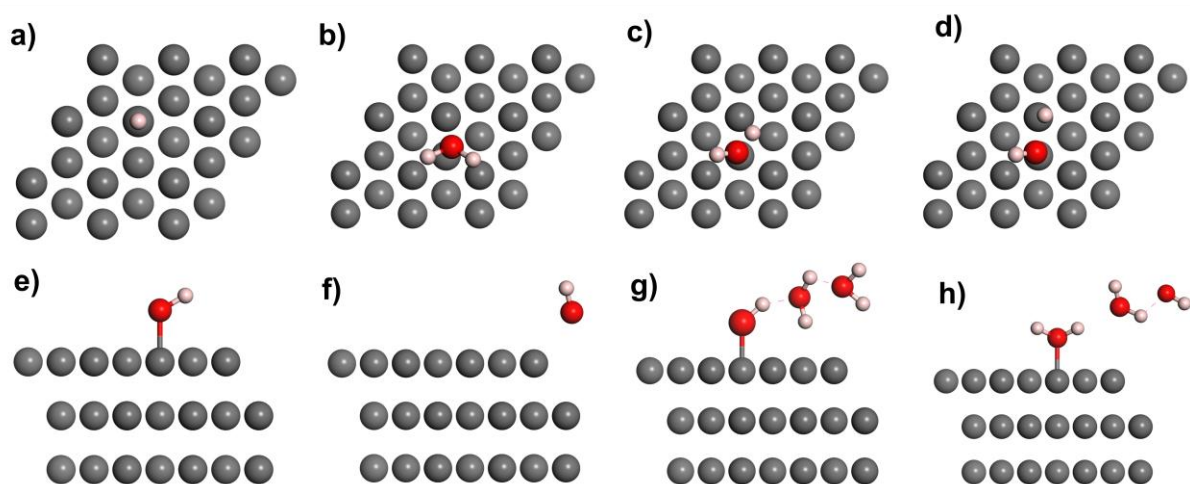

**Fig. S31.** HER at Ni in alkaline media: a) Hydrogen adsorption. b) IS, c) TS and d) FS of water adsorption and dissociation processes. (e-f) OH\* direct desorption process. (g-h) Water-assisted OH\* desorption process.



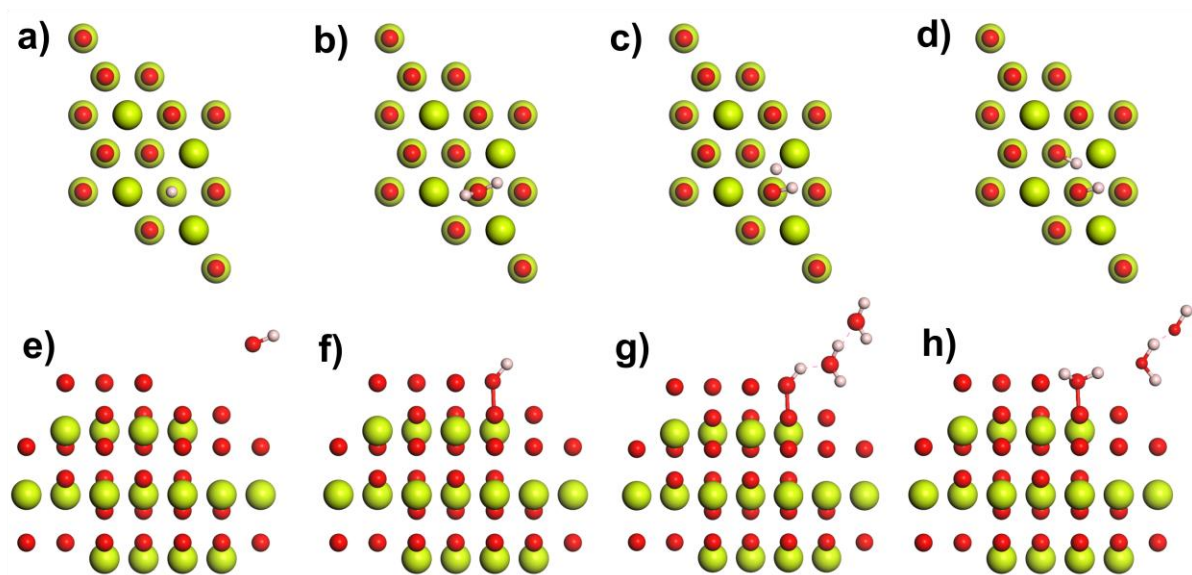

**Fig. S32.** HER at  $\text{CeO}_{2-\delta}$  in alkaline media: a) Hydrogen adsorption. b) IS, c) TS and d) FS of water adsorption and dissociation processes. (e-f)  $\text{OH}^*$  direct desorption process. (g-h) Water-assisted  $\text{OH}^*$  desorption process.

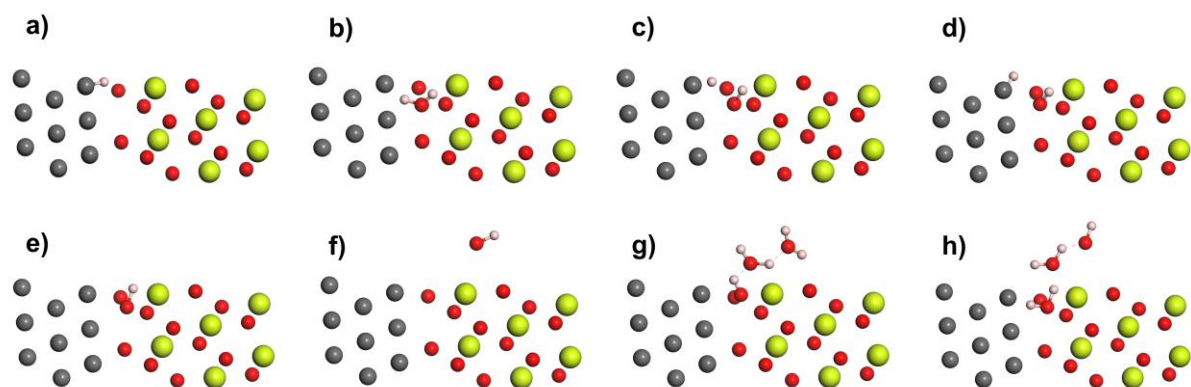

**Fig. S33.** HER at Ni/CeO<sub>2-δ</sub> in alkaline media: a) Hydrogen adsorption. b) IS, c) TS and d) FS of water adsorption and dissociation processes. (e-f) OH\* direct desorption process. (g-h) Water-assisted OH\* desorption process.



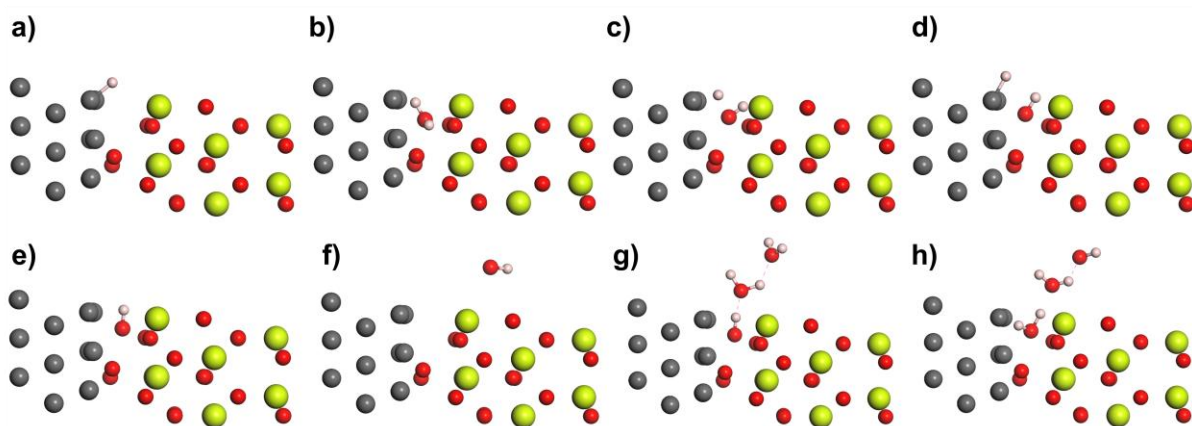

**Fig. S34.** HER at Ni/CeO<sub>2-2δ</sub> in alkaline media: a) Hydrogen adsorption. b) IS, c) TS and d) FS of water adsorption and dissociation process. (e-f) OH\* direct desorption process. (g-h) Water-assisted OH\* desorption process.

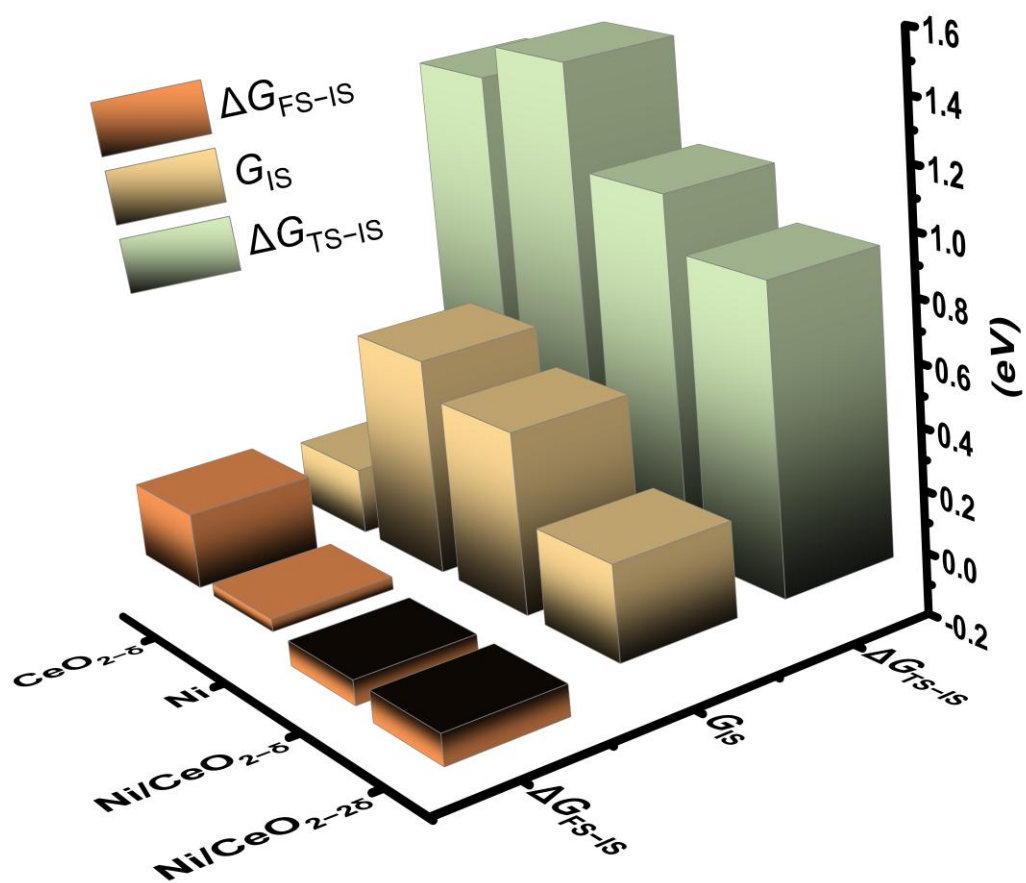

**Fig. S35.** Trends in Gibbs free energy values for the water dissociation process at  $\text{CeO}_{2-\delta}$ , Ni,  $\text{Ni/CeO}_{2-\delta}$ , and  $\text{Ni/CeO}_{2-2\delta}$ .

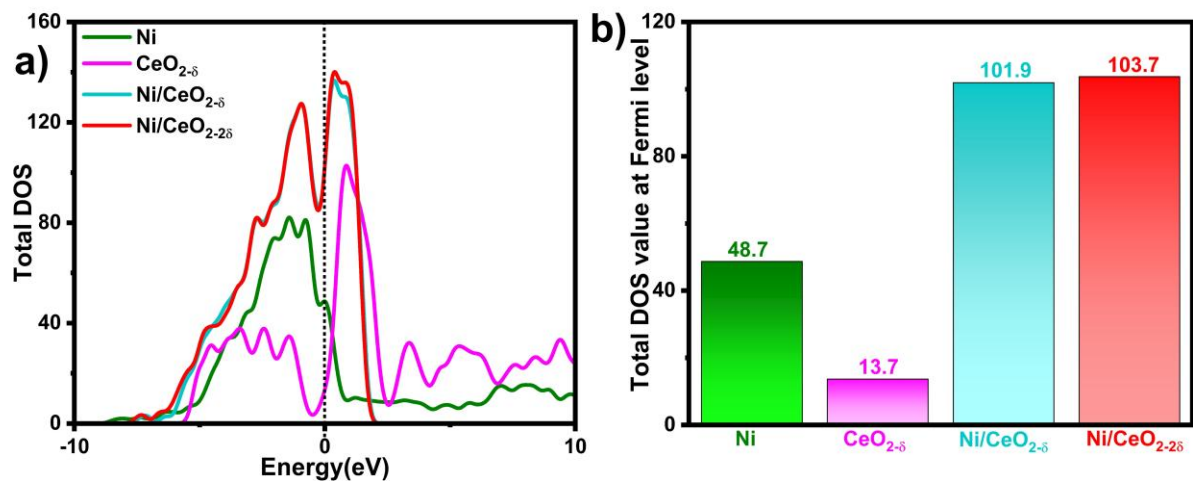

**Fig. S36.** a) The total DOS plots of Ni, CeO<sub>2-δ</sub>, Ni/CeO<sub>2-δ</sub>, and Ni/CeO<sub>2-2δ</sub>. b) Their total DOS values at the Fermi level.

**Table S1.** Atomic percentages of Ni and Ce in the designed films, the corresponding total metals mass, and deposition efficiency from ICP-OES data.

| <b>Film</b>                 | <b>Ce atomic %</b> | <b>Ni atomic %</b> | <b>Total metals mass (mg)</b> | <b>Deposition faradaic efficiency %</b> |
|-----------------------------|--------------------|--------------------|-------------------------------|-----------------------------------------|
| CeO <sub>x</sub> (2 A)      | 100                | -                  | 4.83                          | 0.37                                    |
| Ni (2 A)                    | -                  | 100                | 19.05                         | 6.96                                    |
| Ni/CeO <sub>x</sub> (0.1 A) | 0.26               | 99.74              | 32.23                         | 11.72                                   |
| Ni/CeO <sub>x</sub> (0.5 A) | 3.88               | 96.12              | 28.77                         | 9.78                                    |
| Ni/CeO <sub>x</sub> (1 A)   | 2.91               | 97.09              | 24.34                         | 8.42                                    |
| Ni/CeO <sub>x</sub> (2 A)   | 2.8                | 97.2               | 22.45                         | 7.78                                    |
| Ni/CeO <sub>x</sub> (3 A)   | 3.6                | 96.4               | 21.45                         | 7.32                                    |

**Table S2.** XRD cubic Ni peaks' positions for all prepared films.

| Film                        | Facet      |            |            |            |            |
|-----------------------------|------------|------------|------------|------------|------------|
|                             | 111/degree | 200/degree | 220/degree | 311/degree | 222/degree |
| Ni (2 Å)                    | 44.50      | 51.84      | 76.38      | 92.92      | 98.44      |
| Ni/CeO <sub>x</sub> (0.1 Å) | 44.47      | 51.79      | 76.42      | 92.90      | 98.42      |
| Ni/CeO <sub>x</sub> (0.5 Å) | 44.52      | 51.94      | 76.42      | 92.95      | 98.53      |
| Ni/CeO <sub>x</sub> (1 Å)   | 44.50      | 51.84      | 76.42      | 92.97      | 98.46      |
| Ni/CeO <sub>x</sub> (3 Å)   | 44.39      | 51.72      | 76.26      | 92.88      | 98.44      |
| Ni/CeO <sub>x</sub> (2 Å)   | 44.55      | 51.86      | 76.40      | 92.97      | 98.45      |

**Table S3.** Comparison between the activities of HER electrocatalysts in alkaline media.

| <b>Electrocatalyst</b>                                             | <b>Current density (mA)</b> | <b>Overpotential (mV)</b> | <b>Electrolyte</b> | <b>Ref.</b> |
|--------------------------------------------------------------------|-----------------------------|---------------------------|--------------------|-------------|
| Pt/C/NF                                                            | 1000                        | 590                       | 1.0 M KOH          | 17          |
| Ni <sub>2</sub> P/NF                                               | 1000                        | 306                       | 1.0 M KOH          | 17          |
| Pt/C                                                               | 700                         | 200                       | 1.0 M KOH          | 18          |
| Ni-CO-P/NF                                                         | 1000                        | 300                       | 1.0 M KOH          | 18          |
| Pt/C                                                               | 500                         | 295                       | 1.0 M KOH          | 19          |
| Fe-Co <sub>0.85</sub> Se/FeCo LDH                                  | 500                         | 274                       | 1.0 M KOH          | 19          |
| Co-Mo <sub>5</sub> N <sub>6</sub>                                  | 1000                        | 280                       | 1.0 M KOH          | 20          |
| Pt/C                                                               | 1000                        | 650                       | 1.0 M KOH          | 20          |
| Ni(OH) <sub>x</sub> /Ni <sub>3</sub> S <sub>2</sub> /NF            | 1000                        | 238                       | 1.0 M KOH          | 21          |
| Pt/NiO <sub>x</sub> -O <sub>v</sub> /NF                            | 500                         | 180                       | 1.0 M KOH          | 22          |
| IrNi-FeNi <sub>3</sub>                                             | 1000                        | 289                       | 1.0 M KOH          | 23          |
| Pt/C/CuF                                                           | 1000                        | 450                       | 1.0 M KOH          | 24          |
| CuMo <sub>6</sub> S <sub>8</sub> /Cu                               | 1000                        | 320                       | 1.0 M KOH          | 24          |
| Co-P                                                               | 1000                        | 227                       | 1.0 M KOH          | 25          |
| MoS <sub>2</sub> /Mo <sub>2</sub> C                                | 1000                        | 220                       | 1.0 M KOH          | 26          |
| Ni <sub>3</sub> S <sub>2</sub> /Cr <sub>2</sub> S <sub>3</sub> @NF | 1000                        | 227                       | 1.0 M KOH          | 27          |
| Ni <sub>2(1-x)</sub> Mo <sub>2x</sub> P                            | 1000                        | 294                       | 1.0 M KOH          | 28          |
| Ru-CoO <sub>x</sub> /NF                                            | 1000                        | 252                       | 1.0 M KOH          | 29          |
| N-NiMoS                                                            | 1000                        | 322                       | 1.0 M KOH          | 30          |
| A-NiCo LDH/NF                                                      | 1000                        | 381                       | 1.0 M KOH          | 31          |
| Ni-P-B/NF                                                          | 1000                        | 275                       | 1.0 M KOH          | 32          |
| Pd <sub>4</sub> S/Pd <sub>3</sub> P <sub>0.95</sub>                | 500                         | 387                       | 1.0 M KOH          | 33          |

|                                                                           |      |     |           |           |
|---------------------------------------------------------------------------|------|-----|-----------|-----------|
| MnO <sub>x</sub> /NiFeP/NF                                                | 500  | 255 | 1.0 M KOH | 34        |
| Mo <sub>2</sub> C/MoC/CNT                                                 | 1000 | 233 | 1.0 M KOH | 35        |
| FeIr/NF                                                                   | 1000 | 204 | 1.0 M KOH | 36        |
| P-Mo <sub>2</sub> N-CNS                                                   | 1000 | 256 | 1.0 M KOH | 37        |
| Ni <sub>3</sub> S <sub>2</sub> -NiMoO <sub>4</sub> /NF                    | 1000 | 257 | 1.0 M KOH | 38        |
| P-Fe <sub>3</sub> O <sub>4</sub> /IF                                      | 1000 | 240 | 1.0 M KOH | 39        |
| FeCoNiP <sub>0</sub> S <sub>1</sub>                                       | 1000 | 264 | 1.0 M KOH | 40        |
| Fe <sub>2</sub> P-Co <sub>2</sub> P/CF                                    | 1000 | 254 | 1.0 M KOH | 41        |
| NiCoS <sub>x</sub> Se <sub>y</sub>                                        | 1000 | 345 | 1.0 M KOH | 42        |
| Ni/W <sub>5</sub> N <sub>4</sub> /NF                                      | 1000 | 291 | 1.0 M KOH | 43        |
| CoRu/NC-700                                                               | 1000 | 217 | 1.0 M KOH | 44        |
| Ni/Fe <sub>3</sub> O <sub>4</sub> /IF                                     | 1000 | 387 | 1.0 M KOH | 45        |
| Ni-FeO <sub>x</sub> /FeNi <sub>3</sub> /NF                                | 1000 | 272 | 1.0 M KOH | 46        |
| Co-MoS <sub>2</sub> /V <sub>2</sub> C@CC                                  | 1000 | 296 | 1.0 M KOH | 47        |
| 3F-FeP                                                                    | 1000 | 302 | 1.0 M KOH | 48        |
| NiCoSeP                                                                   | 1000 | 290 | 1.0 M KOH | 49        |
| H-CoS <sub>x</sub> @NiFe LDH/NF                                           | 1000 | 375 | 1.0 M KOH | 50        |
| Ni <sub>5</sub> P <sub>4</sub> -Co <sub>2</sub> P/NCF                     | 1000 | 267 | 1.0 M KOH | 51        |
| (WO <sub>2</sub> -Ni <sub>17</sub> W <sub>3</sub> )/NiFe(OH) <sub>x</sub> | 1000 | 258 | 1.0 M KOH | 52        |
| Fe-Ni <sub>2</sub> P@C/NF                                                 | 1000 | 313 | 1.0 M KOH | 53        |
| NiMoP                                                                     | 700  | 390 | 1.0 M KOH | 54        |
| GDY-Pd1                                                                   | 1000 | 261 | 1.0 M KOH | 55        |
| Ni <sub>2</sub> P/WO <sub>2.83</sub> /NF                                  | 1000 | 255 | 1.0 M KOH | 56        |
| Ni/CeO <sub>x</sub> (2 A)                                                 | 1000 | 201 | 1.0 M KOH | This work |



**Table S4.** Comparison between the performance of AEMWEs.

| System<br>Cathode/ <b>membrane</b> /anode                                                                      | Current<br>(A) | Voltage<br>(V) | IR-free Voltage<br>(V) | Media     | Temp.<br>(°C) | Ref.      |
|----------------------------------------------------------------------------------------------------------------|----------------|----------------|------------------------|-----------|---------------|-----------|
| NiFe/TP-4/ <b>X37-50 Grade T</b> /NiMo/TP-4                                                                    | 2              | 2              | 1.87                   | 1.0 M KOH | 50-55         | 57        |
| Pt@S-NiFe LDH/ <b>FAA-3-PK-130</b> /S-NiFe LDH                                                                 | 0.2            | 1.74           | -                      | 1.0 M KOH | 65            | 58        |
| Pt/C/ <b>FAA-3-50, Fumapem</b> /CoSb <sub>2</sub> O <sub>6</sub>                                               | 0.8            | 1.9            | 1.769                  | 1.0 M KOH | 60            | 59        |
| NiCoO-NiCo/C/ <b>X37-50 Grade T</b> /CuCoO                                                                     | 0.504          | 1.85           | -                      | 1.0 M KOH | 50            | 60        |
| Pt/C/ <b>X37-50 Grade T</b> /CF-FeSO                                                                           | 0.1            | 1.61           | -                      | 1.0 M KOH | -             | 61        |
| Pt/C / <b>Fumasep FAA-3-50</b> /Ni <sub>2</sub> P/Ni <sub>7</sub> S <sub>6</sub>                               | 0.204          | 2              | 1.75                   | 1.0 M KOH | 25            | 62        |
| <b>MOC-Ru/-/RuO2</b>                                                                                           | 0.25           | 1.97           | -                      | 1.0 M KOH | Room temp.    | 63        |
| <b>3-Co<sub>3</sub>S<sub>4</sub> NS/NF/ X37-50</b> /Cu <sub>0.81</sub> Co <sub>2.19</sub> O <sub>4</sub> NS/NF | 0.431          | 2              | -                      | 1.0 M KOH | 45-48         | 64        |
| NiMoCo alloy/ <b>Sustainion X37-FA</b> /NiFeCr-LDH                                                             | 1              | 2.11           | -                      | 1.0 M KOH | 40            | 65        |
| NiFeS@Ti <sub>3</sub> C <sub>2</sub> / <b>X37-50 RT</b> /NiFeS@Ti <sub>3</sub> C <sub>2</sub>                  | 0.401          | 1.85           | -                      | 1.0 M KOH | 50            | 66        |
| NiFeP_FA_NN/ <b>FAA-3-PE-30</b> /NiFe_FA_NN                                                                    | 0.5            | 2              | -                      | 1.0 M KOH | 60            | 67        |
| Ni-W-600@CP/ <b>A201</b> /Ir black/Ti foam                                                                     | 1              | 2.3            | -                      | 1.0 M KOH | 50            | 68        |
| Pt/C/ <b>HoAM Grion 1204</b> / Mo-CoOOH                                                                        | 1              | 2.08           | -                      | 1.0 M KOH | 85            | 69        |
| <b>NA-Ru<sub>3</sub>Ni/C/ X37-50</b> /NA-Ru <sub>3</sub> Ni/C                                                  | 1              | 2.048          | -                      | 1.0 M KOH | 60            | 70        |
| Pt/C/ <b>X37-50</b> / (NiCo) <sub>3</sub> Se <sub>4</sub>                                                      | 2              | 2              | -                      | 1.0 M KOH | 60            | 71        |
| Ni <sub>3</sub> N/Ni/Ti mesh/ <b>Fumapem FA-3-50</b> /NiFe <sub>2</sub> O <sub>4</sub>                         | 0.5            | 1.88           | 1.802                  | 1.0 M KOH | 55            | 72        |
| NiMoN/ <b>X37-50 RT</b> / d-(Fe,Ni)OOH                                                                         | 0.5            | 1.795          | -                      | 1.0 M KOH | 73            | 73        |
|                                                                                                                | 5              | 2.078          | 1.793                  |           |               |           |
| Ni/CeO <sub>x</sub> (2 A)/ <b>PiperION-20</b> /Ni-Fe-Zn                                                        | 4              | 2.001          | 1.772                  |           |               |           |
|                                                                                                                | 3              | 1.918          | 1.746                  |           |               |           |
|                                                                                                                | 2              | 1.981          | 1.779                  | 1.0 M KOH | 60            | This work |
| Ni/CeO <sub>x</sub> (2 A)/ <b>X37-50 Grade T</b> /Ni-Fe-Zn                                                     | 1              | 1.843          | 1.742                  |           |               |           |
|                                                                                                                | 0.5            | 1.754          | 1.703                  |           |               |           |

**Table S5.** Lattice parameters of Ni, CeO<sub>2</sub> and Ni/CeO<sub>2</sub>.

|                           | <b>a(Å)</b> | <b>b(Å)</b> | <b>c(Å)</b> | <b><math>\alpha(^{\circ})</math></b> | <b><math>\beta(^{\circ})</math></b> | <b><math>\gamma(^{\circ})</math></b> |
|---------------------------|-------------|-------------|-------------|--------------------------------------|-------------------------------------|--------------------------------------|
| <b>Ni</b>                 | 3.53425     | 3.53425     | 3.53425     | 90.0000                              | 90.0000                             | 90.0000                              |
| <b>CeO<sub>2</sub></b>    | 5.47472     | 5.47472     | 5.47472     | 90.0000                              | 90.0000                             | 90.0000                              |
| <b>Ni/CeO<sub>2</sub></b> | 7.61985     | 7.61985     | 19.3633     | 90.0000                              | 90.0000                             | 120.0000                             |

**Table S6.** Gibbs free energy values for the water dissociation process at  $\text{CeO}_{2-\delta}$ , Ni, Ni/ $\text{CeO}_{2-\delta}$ , and Ni/ $\text{CeO}_{2-2\delta}$ .

|                              | $G_{\text{IS}}$ (eV) | $\Delta G_{\text{TS-IS}}$ (eV) | $\Delta G_{\text{FS-IS}}$ (eV) |
|------------------------------|----------------------|--------------------------------|--------------------------------|
| <b>CeO<sub>2-δ</sub></b>     | 0.21                 | 1.36                           | 0.24                           |
| <b>Ni</b>                    | 0.68                 | 1.47                           | 0.04                           |
| <b>Ni/CeO<sub>2-δ</sub></b>  | 0.57                 | 1.14                           | − 0.08                         |
| <b>Ni/CeO<sub>2-2δ</sub></b> | 0.3                  | 0.97                           | − 0.1                          |

**Table S7.** Representation of the atoms in the DFT model.

| Atom | Color      | RGB         | Radius |
|------|------------|-------------|--------|
| Ce   | Lime green | 209 252 6   | 1.82   |
| Ni   | Grey       | 109 109 109 | 1.25   |
| O    | Red        | 254 3 0     | 0.74   |
| H    | Light pink | 255 204 204 | 0.46   |

## References

1. Aldykiewicz, A. J., Davenport, A. J. & Isaacs, H. S. Studies of the formation of cerium-rich protective films using X-ray Absorption near-edge spectroscopy and rotating disk electrode methods. *J. Electrochem. Soc.* **143**, 147 (1996).
2. Liu, F. *et al.* Rational design of better hydrogen evolution electrocatalysts for water splitting: a review. *Adv. Sci.* **9**, 2200307 (2022).
3. Chen, N. *et al.* Plasma-Engineered MoP with nitrogen doping: Electron localization toward efficient alkaline hydrogen evolution. *Appl. Catal. B Environ.* **268**, 118441 (2020).
4. McCrory, C. C. L. *et al.* Benchmarking hydrogen evolving reaction and oxygen evolving reaction electrocatalysts for solar water splitting devices. *J. Am. Chem. Soc.* **137**, 4347–4357 (2015).
5. McCrory, C. C. L., Jung, S., Peters, J. C. & Jaramillo, T. F. Benchmarking heterogeneous electrocatalysts for the oxygen evolution reaction. *J. Am. Chem. Soc.* **135**, 16977–16987 (2013).
6. Yang, Y. *et al.* Anion-exchange membrane water electrolyzers and fuel cells. *Chem. Soc. Rev.* (2022).
7. Liang, Z. *et al.* Modulating the Electronic Structure of Cobalt-Vanadium Bimetal Catalysts for High-Stable Anion Exchange Membrane Water Electrolyzer. *Adv. Mater.* **36**, 2408634 (2024).
8. Wan, L. *et al.* Key components and design strategy of the membrane electrode assembly for alkaline water electrolysis. *Energy Environ. Sci.* **16**, 1384–1430 (2023).
9. Patnaik, P. *Handbook of inorganic chemicals*. vol. 529 (McGraw-Hill New York, 2003).
10. Yang, L., Pang, X., Fox-Rabinovich, G., Veldhuis, S. & Zhitomirsky, I. Electrodeposition of cerium oxide films and composites. *Surf. Coatings Technol.* **206**, 1–7 (2011).
11. Zhang, Q. *et al.* Myriophyllum-like hierarchical TiN@ Ni<sub>3</sub>N nanowire arrays for bifunctional water splitting catalysts. *J. Mater. Chem. A* **4**, 5713–5718 (2016).
12. Xiong, W., Guo, Z., Li, H., Zhao, R. & Wang, X. Rational Bottom-Up Engineering of Electrocatalysts by Atomic Layer Deposition: A Case Study of Fe<sub>x</sub>Co<sub>1-x</sub>S<sub>y</sub>-Based Catalysts for Electrochemical Hydrogen Evolution. *Acs Energy Lett.* **2**, 2778–2785 (2017).
13. Zhao, J., Zhang, J., Li, Z. & Bu, X. Recent Progress on NiFe-Based Electrocatalysts for the Oxygen Evolution Reaction. *Small* **16**, 2003916 (2020).
14. Anantharaj, S., Kundu, S. & Noda, S. “The Fe Effect”: A review unveiling the critical roles of Fe in enhancing OER activity of Ni and Co based catalysts. *Nano Energy* **80**, 105514 (2021).
15. Jamesh, M.-I. & Harb, M. Tuning the electronic structure of the earth-abundant electrocatalysts for oxygen evolution reaction (OER) to achieve efficient alkaline water splitting—A review. *J. Energy Chem.* **56**, 299–342 (2021).
16. Jamesh, M.-I. & Sun, X. Recent progress on earth abundant electrocatalysts for oxygen evolution reaction (OER) in alkaline medium to achieve efficient water splitting—A review. *J. Power Sources* **400**, 31–68 (2018).
17. Yu, X. *et al.* “Superaerophobic” nickel phosphide nanoarray catalyst for efficient hydrogen evolution at ultrahigh current densities. *J. Am. Chem. Soc.* **141**, 7537–7543 (2019).
18. Yu, C. *et al.* Bimetallic Ni–Co phosphide nanosheets self-supported on nickel foam as high-performance electrocatalyst for hydrogen evolution reaction. *Electrochim. Acta* **317**, 191–198 (2019).

19. Yu, H. *et al.* Modulating Local Interfacial Bonding Environment of Heterostructures for Energy-Saving Hydrogen Production at High Current Densities. *Adv. Funct. Mater.* **33**, 2212811 (2023).
20. Lin, F. *et al.* Electrocatalytic hydrogen evolution of ultrathin Co-Mo<sub>5</sub>N<sub>6</sub> heterojunction with interfacial electron redistribution. *Adv. Energy Mater.* **10**, 2002176 (2020).
21. He, W. *et al.* Super-Hydrophilic Microporous Ni (OH) x/Ni<sub>3</sub>S<sub>2</sub> Heterostructure Electrocatalyst for Large-Current-Density Hydrogen Evolution. *Small* **19**, 2205719 (2023).
22. Wang, K. *et al.* Dense Platinum/Nickel Oxide Heterointerfaces with Abundant Oxygen Vacancies Enable Ampere-Level Current Density Ultrastable Hydrogen Evolution in Alkaline. *Adv. Funct. Mater.* **33**, 2211273 (2023).
23. Wang, Y. *et al.* Industrially promising IrNi-FeNi<sub>3</sub> hybrid nanosheets for overall water splitting catalysis at large current density. *Appl. Catal. B Environ.* **286**, 119881 (2021).
24. Liu, H. *et al.* Dual interfacial engineering of a Chevrel phase electrode material for stable hydrogen evolution at 2500 mA cm<sup>-2</sup>. *Nat. Commun.* **13**, 1–10 (2022).
25. Jiang, N., You, B., Sheng, M. & Sun, Y. Electrodeposited cobalt-phosphorous-derived films as competent bifunctional catalysts for overall water splitting. *Angew. Chemie* **127**, 6349–6352 (2015).
26. Luo, Y. *et al.* Morphology and surface chemistry engineering toward pH-universal catalysts for hydrogen evolution at high current density. *Nat. Commun.* **10**, 269 (2019).
27. Fu, H. Q. *et al.* Hydrogen spillover-bridged Volmer/Tafel processes enabling ampere-level current density alkaline hydrogen evolution reaction under low overpotential. *J. Am. Chem. Soc.* **144**, 6028–6039 (2022).
28. Yu, L. *et al.* Ternary Ni<sub>2</sub> (1-x) Mo<sub>2</sub>xP nanowire arrays toward efficient and stable hydrogen evolution electrocatalysis under large-current-density. *Nano Energy* **53**, 492–500 (2018).
29. Wu, D., Chen, D., Zhu, J. & Mu, S. Ultralow Ru incorporated amorphous cobalt-based oxides for high-current-density overall water splitting in alkaline and seawater media. *Small* **17**, 2102777 (2021).
30. Huang, C. *et al.* N-doped Ni-Mo based sulfides for high-efficiency and stable hydrogen evolution reaction. *Appl. Catal. B Environ.* **276**, 119137 (2020).
31. Yang, H., Chen, Z., Guo, P., Fei, B. & Wu, R. B-doping-induced amorphization of LDH for large-current-density hydrogen evolution reaction. *Appl. Catal. B Environ.* **261**, 118240 (2020).
32. Hao, W. *et al.* Fabrication of practical catalytic electrodes using insulating and eco-friendly substrates for overall water splitting. *Energy Environ. Sci.* **13**, 102–110 (2020).
33. Zhang, G. *et al.* Interfacial engineering to construct antioxidative Pd<sub>4</sub>S/Pd<sub>3</sub>P<sub>0.95</sub> heterostructure for robust hydrogen production at high current density. *Adv. Energy Mater.* **12**, 2103511 (2022).
34. Wang, P. *et al.* MnO<sub>x</sub>-Decorated Nickel-Iron Phosphides Nanosheets: Interface Modifications for Robust Overall Water Splitting at Ultra-High Current Densities. *Small* **18**, 2105803 (2022).
35. Li, C. *et al.* Ultrafast self-heating synthesis of robust heterogeneous nanocarbides for high current density hydrogen evolution reaction. *Nat. Commun.* **13**, 3338 (2022).
36. Shen, F. *et al.* Bimetallic iron-iridium alloy nanoparticles supported on nickel foam as highly efficient and stable catalyst for overall water splitting at large current density. *Appl. Catal. B Environ.* **278**, 119327 (2020).
37. Wang, Q. *et al.* Free-standing phosphorous-doped molybdenum nitride in 3D carbon

- nanosheet towards hydrogen evolution at all pH values. *J. Energy Chem.* **50**, 44–51 (2020).
38. Zhuo, X. *et al.* Crystalline–Amorphous Ni<sub>3</sub>S<sub>2</sub>–NiMoO<sub>4</sub> Heterostructure for Durable Urea Electrolysis-Assisted Hydrogen Production at High Current Density. *ACS Appl. Mater. Interfaces* **14**, 46481–46490 (2022).
  39. Zhang, J. *et al.* Modulation of inverse spinel Fe<sub>3</sub>O<sub>4</sub> by phosphorus doping as an industrially promising electrocatalyst for hydrogen evolution. *Adv. Mater.* **31**, 1905107 (2019).
  40. Wang, X. *et al.* Amorphous multi-elements electrocatalysts with tunable bifunctionality toward overall water splitting. *ACS Catal.* **8**, 9926–9935 (2018).
  41. Liu, X. *et al.* In situ-grown cobalt–iron phosphide-based integrated electrode for long-term water splitting under a large current density at the industrial electrolysis temperature. *ACS Sustain. Chem. Eng.* **8**, 17828–17838 (2020).
  42. Ma, S. *et al.* One-step in-situ sprouting high-performance NiCoS<sub>x</sub>Se<sub>y</sub> bifunctional catalysts for water electrolysis at low cell voltages and high current densities. *Chem. Eng. J.* **435**, 134859 (2022).
  43. Zhou, Y. *et al.* Surface reconstruction and charge distribution enabling Ni/W<sub>5</sub>N<sub>4</sub> Mott-Schottky heterojunction bifunctional electrocatalyst for efficient urea-assisted water electrolysis at a large current density. *Appl. Catal. B Environ.* **323**, 122168 (2023).
  44. Chen, J. *et al.* Enhancing the electronic metal-support interaction of CoRu alloy and pyridinic N for electrocatalytic pH-universal hydrogen evolution reaction. *Chem. Eng. J.* **450**, 138026 (2022).
  45. Xu, W. *et al.* Tailoring interfacial electron redistribution of Ni/Fe<sub>3</sub>O<sub>4</sub> electrocatalysts for superior overall water splitting. *J. Energy Chem.* **73**, 330–338 (2022).
  46. Qayum, A. *et al.* Highly Durable and Efficient Ni–FeO<sub>x</sub>/FeNi<sub>3</sub> Electrocatalysts Synthesized by a Facile In Situ Combustion-Based Method for Overall Water Splitting with Large Current Densities. *ACS Appl. Mater. Interfaces* **14**, 27842–27853 (2022).
  47. Chen, Y. *et al.* Interfacial engineering of Co-doped 1T–MoS<sub>2</sub> coupled with V<sub>2</sub>C MXene for efficient electrocatalytic hydrogen evolution. *Chem. Eng. J.* **450**, 138157 (2022).
  48. Zhang, X.-Y. *et al.* Tailoring the d-band centers of FeP nanobelt arrays by fluorine doping for enhanced hydrogen evolution at high current density. *Fuel* **316**, 123206 (2022).
  49. Maleki, M., Sabour Rouhaghdam, A., Barati Darband, G., Han, D. & Shanmugam, S. Highly active and durable NiCoSeP nanostructured electrocatalyst for large-current-density hydrogen production. *ACS Appl. Energy Mater.* **5**, 2937–2948 (2022).
  50. Lee, Y. J. & Park, S. Metal–Organic Framework-Derived Hollow CoS<sub>x</sub> Nanoarray Coupled with NiFe Layered Double Hydroxides as Efficient Bifunctional Electrocatalyst for Overall Water Splitting. *Small* **18**, 2200586 (2022).
  51. Ma, S. *et al.* Compositional and crystallographic design of Ni–Co phosphide heterointerfaced nanowires for high-rate, stable hydrogen generation at industry-relevant electrolysis current densities. *Nano Energy* **95**, 106989 (2022).
  52. Liu, J. *et al.* Amorphous-crystalline heterostructure for simulated practical water splitting at high-current–density. *Chem. Eng. J.* **431**, 134247 (2022).
  53. Li, D. *et al.* Coupling overall water splitting and biomass oxidation via Fe-doped Ni<sub>2</sub>P@C nanosheets at large current density. *Appl. Catal. B Environ.* **307**, 121170 (2022).
  54. Mandavkar, R. *et al.* Electron enriched ternary NiMoB electrocatalyst for improved overall water splitting: Better performance as compared to the Pt/C|| RuO<sub>2</sub> at high



- current density. *Appl. Mater. Today* **29**, 101579 (2022).
55. Zhang, D. *et al.* Controlled growth of single-crystal Pd quantum dots on 2D carbon for large current density hydrogen evolution. *Adv. Funct. Mater.* **32**, 2111501 (2022).
  56. Zhou, Y. *et al.* Heterointerface and defect dual engineering in a superhydrophilic Ni<sub>2</sub>P/WO<sub>2</sub>. 83 microsphere for boosting alkaline hydrogen evolution reaction at high current density. *ACS Appl. Mater. Interfaces* **14**, 18816–18824 (2022).
  57. Oh, J. H. *et al.* Self-supported electrodes to enhance mass transfer for high-performance anion exchange membrane water electrolyzer. *Chem. Eng. J.* **460**, 141727 (2023).
  58. Lei, H., Wan, Q., Tan, S., Wang, Z. & Mai, W. Pt-Quantum-Dot-Modified Sulfur-Doped NiFe Layered Double Hydroxide for High-Current-Density Alkaline Water Splitting at Industrial Temperature. *Adv. Mater.* **35**, 2208209 (2023).
  59. Ham, K., Hong, S., Kang, S., Cho, K. & Lee, J. Extensive active-site formation in trirutile CoSb<sub>2</sub>O<sub>6</sub> by oxygen vacancy for oxygen evolution reaction in anion exchange membrane water splitting. *ACS Energy Lett.* **6**, 364–370 (2021).
  60. Park, Y. S. *et al.* Commercial anion exchange membrane water electrolyzer stack through non-precious metal electrocatalysts. *Appl. Catal. B Environ.* **292**, 120170 (2021).
  61. Lee, W. H. *et al.* Electrode reconstruction strategy for oxygen evolution reaction: maintaining Fe-CoOOH phase with intermediate-spin state during electrolysis. *Nat. Commun.* **13**, 605 (2022).
  62. Wang, F.-L. *et al.* Porous heterojunction of Ni<sub>2</sub>P/Ni<sub>7</sub>S<sub>6</sub> with high crystalline phase and superior conductivity for industrial anion exchange membrane water electrolysis. *Appl. Catal. B Environ.* **330**, 122633 (2023).
  63. Yang, C. *et al.* Mn-Oxygen Compounds Coordinated Ruthenium Sites with Deprotonated and Low Oxophilic Microenvironments for Membrane Electrolyzer-based H<sub>2</sub>-Production. *Adv. Mater.* 2303331 (2023).
  64. Park, Y. S. *et al.* Co<sub>3</sub>S<sub>4</sub> nanosheets on Ni foam via electrodeposition with sulfurization as highly active electrocatalysts for anion exchange membrane electrolyzer. *Int. J. Hydrogen Energy* **45**, 36–45 (2020).
  65. Wang, M. H. *et al.* Operando High-Valence Cr-Modified NiFe Hydroxides for Water Oxidation. *Small* **18**, 2200303 (2022).
  66. Chanda, D. *et al.* Effect of the interfacial electronic coupling of nickel-iron sulfide nanosheets with layer Ti<sub>3</sub>C<sub>2</sub> MXenes as efficient bifunctional electrocatalysts for anion-exchange membrane water electrolysis. *Appl. Catal. B Environ.* **321**, 122039 (2023).
  67. Wei, Z., Guo, M. & Zhang, Q. Scalable electrodeposition of NiFe-based electrocatalysts with self-evolving multi-vacancies for high-performance industrial water electrolysis. *Appl. Catal. B Environ.* **322**, 122101 (2023).
  68. Li, Y. *et al.* Ni<sub>17</sub>W<sub>3</sub>-W Interconnected Hybrid Prepared by Atmosphere-and Thermal-Induced Phase Separation for Efficient Electrocatalysis of Alkaline Hydrogen Evolution. *Small* **16**, 2005184 (2020).
  69. Tang, L. *et al.* Three-dimensional CoOOH nanoframes confining high-density Mo single atoms for large-current-density oxygen evolution. *J. Mater. Chem. A* **10**, 6242–6250 (2022).
  70. Gao, L. *et al.* Engineering a local potassium cation concentrated microenvironment toward the ampere-level current density hydrogen evolution reaction. *Energy Environ. Sci.* (2023).
  71. Abed, J. *et al.* In situ formation of nano ni-co oxyhydroxide enables water oxidation electrocatalysts durable at high current densities. *Adv. Mater.* **33**, 2103812 (2021).

72. Zhang, D. *et al.* Unconventional direct synthesis of Ni<sub>3</sub>N/Ni with N-vacancies for efficient and stable hydrogen evolution. *Energy Environ. Sci.* **15**, 185–195 (2022).
73. Wu, L. *et al.* Boosting oxygen evolution reaction of (Fe, Ni) OOH via defect engineering for anion exchange membrane water electrolysis under industrial conditions. *Adv. Mater.* **35**, 2306097 (2023).
